1                   **The translational landscape of SARS-CoV-2 and infected cells**

2

3

4   Maritza Puray-Chavez<sup>1,\*</sup>, Kasyap Tenneti<sup>1,\*</sup>, Hung R. Vuong<sup>1,\*</sup>, Nakyung Lee<sup>1,\*</sup>, Yating  
5   Liu<sup>2</sup>, Amjad Horani<sup>3</sup>, Tao Huang<sup>4</sup>, Sean P. Gunsten<sup>4</sup>, James B. Case<sup>5</sup>, Wei Yang<sup>2</sup>, Michael  
6   S. Diamond<sup>1,5,6</sup>, Steven L. Brody<sup>4</sup>, Joseph Dougherty<sup>2,7</sup>, Sebla B. Kutluay<sup>1</sup>

7

8

9   <sup>1</sup> Department of Molecular Microbiology, Washington University School of Medicine,  
10   Saint Louis, MO 63110, USA

11   <sup>2</sup> Department of Genetics, Washington University School of Medicine, Saint Louis, MO  
12   63110, USA

13   <sup>3</sup> Department of Pediatrics, Allergy, Immunology and Pulmonary Medicine, Washington  
14   University School of Medicine, Saint Louis, MO 63110, USA

15   <sup>4</sup> Department of Medicine, Pulmonary and Critical Care Medicine, Washington University  
16   School of Medicine, Saint Louis, MO 63110, USA

17   <sup>5</sup> Department of Medicine, Infectious Disease Division, Washington University School of  
18   Medicine, Saint Louis, MO 63110, USA

19   <sup>6</sup> Department of Pathology & Immunology, Washington University School of Medicine,  
20   Saint Louis, MO 63110, USA

21   <sup>7</sup> Department of Psychiatry, Washington University School of Medicine, Saint Louis, MO  
22   63110, USA

23

24

25   Correspondence: [Kutluay@wustl.edu](mailto:Kutluay@wustl.edu)

26

27 **Highlights**

28

- 29     • Ribo-seq reveals key translationally regulated events in SARS-CoV-2 replication
- 30     • SARS-CoV-2 frameshifting is substantially more efficient than HIV-1
- 31     • SARS-CoV-2 infection results in transcriptional upregulation of inflammatory and
- 32         interferon-stimulated genes
- 33     • SARS-CoV-2 disarms host responses at the level of mRNA translation

34

35

36

37

38

39

40

41

42

43

44

45

46

47

48

49

50

51

52 **Summary**

53 SARS-CoV-2, a betacoronavirus with a positive-sense RNA genome, has caused the  
54 ongoing COVID-19 pandemic. Although a large number of transcriptional profiling studies  
55 have been conducted in SARS-CoV-2 infected cells, little is known regarding the  
56 translational landscape of host and viral proteins. Here, using ribosome profiling in SARS-  
57 CoV-2-infected cells, we identify structural elements that regulate viral gene expression,  
58 alternative translation initiation events, as well as host responses regulated by mRNA  
59 translation. We found that the ribosome density was low within the SARS-CoV-2  
60 frameshifting element but high immediately downstream, which suggests the utilization of  
61 a highly efficient ribosomal frameshifting strategy. In SARS-CoV-2-infected cells, although  
62 many chemokine, cytokine and interferon stimulated genes were upregulated at the  
63 mRNA level, they were not translated efficiently, suggesting a translational block that  
64 disarms host innate host responses. Together, these data reveal the key role of mRNA  
65 translation in SARS-CoV-2 replication and highlight unique mechanisms for therapeutic  
66 development.

67

68

69

70

71

72

73

74 **KEYWORDS:** SARS-CoV-2, ribosome profiling, ribo-seq, mRNA translation, virus  
75 replication, ribosomal frameshifting, virus-host interaction, immune response, translational  
76 repression

77

## 78 INTRODUCTION

79 The Coronavirus (CoV) group encompasses of a number of single-stranded, positive-  
80 sense RNA viruses with unusually large genomes (27-32 kb), which infect a wide range  
81 of animal species, including humans (Masters, 2006, Weiss and Navas-Martin, 2005).  
82 Previously, outbreaks of two members of this group, severe acute respiratory syndrome  
83 (SARS-CoV) and Middle East respiratory syndrome (MERS-CoV), have caused lethal  
84 respiratory illnesses in 2002 and 2012, respectively (de Wit et al., 2016). Presently, SARS-  
85 CoV-2, the causative agent of the ongoing Coronavirus Disease-2019 (COVID-19)  
86 pandemic, has infected millions of people worldwide and has devastated the global  
87 economy. Currently, there are limited options for antiviral or immunomodulatory treatment  
88 against SARS-CoV-2, with only few therapies being currently recommended for more  
89 severe COVID-19 cases. A basic understanding of the replicative mechanisms of SARS-  
90 CoV-2 and associated host responses potentially can foster the development of virus-  
91 specific therapies.

92

93 The first two-thirds of the 5' end of the SARS-CoV-2 genome is composed of two  
94 overlapping open reading frames (ORFs), ORF1a and ORF1b, which encode for two  
95 polyproteins, pp1a and pp1ab (Nakagawa et al., 2016). Pp1a is produced when translation  
96 of the genomic RNA terminates at the stop codon of ORF1a. Pp1ab is generated via a  
97 programmed -1 ribosomal frameshift (PRF) that occurs at the overlap between ORF1a  
98 and ORF1b, permitting the elongating ribosomes to bypass the termination signal in  
99 ORF1a (Plant and Dinman, 2008). Following synthesis, pp1a and pp1ab are cleaved by  
100 viral proteases to generate 15-16 mature nonstructural proteins (nsp) (Nakagawa et al.,  
101 2016). Many proteins encoded in ORF1b, are part the replication complex, thus making  
102 the -1 PRF to generate pp1ab a critical translational event for SARS-CoV-2 replication.  
103 Frameshifting in coronaviruses is regulated by a highly conserved heptanucleotide

104 slippery sequence (UUUAAAC) and an RNA pseudoknot structure a few nucleotides  
105 downstream (Plant and Dinman, 2008). The current models of PRF suggest that  
106 ribosomes stall upon encountering the pseudoknot (Plant et al., 2003, Korniy et al., 2019).  
107 This event presumably enhances the efficiency of ribosomal frameshifting by forcing the  
108 ribosomes to pause on the slippery sequence, which in turn promote the -1 slippage. Once  
109 the pseudoknot unwinds and resolves, the ribosome goes on to translate the alternate  
110 ORF.

111

112 Another well-known frameshifting mechanisms in human viruses is employed by  
113 retroviruses through a stem-loop structure that regulates the expression of Gag/Gag-Pol  
114 transcripts (Jacks et al., 1988, Wilson et al., 1988). Frameshifting here is thought essential  
115 for maintenance of the ratio of Gag and Gag-Pol polyproteins as well as viral infectivity  
116 (Shehu-Xhilaga et al., 2001, Garcia-Miranda et al., 2016). While frameshifting is thought  
117 to be highly inefficient in HIV-1, with only 5-10% of ribosomes continuing into the Pol ORF  
118 (Baril et al., 2003, Dulude et al., 2006, Jacks et al., 1988), CoV frameshifting is thought to  
119 occur at a much higher efficiency (Irigoyen et al., 2016). However, to date, the behavior of  
120 ribosomes within the frameshifting element for neither SARS-CoV-2 nor HIV-1 in infected  
121 cells has been empirically assessed.

122

123 In addition to hijacking the host translational machinery, SARS-CoV-2 can modulate host  
124 mRNA translation so as to suppress the immune system to ensure efficient propagation.  
125 Indeed, several viral proteins reportedly impair host gene expression post-transcriptionally  
126 (Lokugamage et al., 2012, Xiao et al., 2008, Kopecky-Bromberg et al., 2006, Huang et al.,  
127 2011, Zhou et al., 2008, Kamitani et al., 2009, Narayanan et al., 2008, Nakagawa et al.,  
128 2016). SARS-CoV nonstructural protein nsp1 induces endonucleolytic cleavage in the 5'-  
129 UTR of cellular mRNAs, accelerating their turnover, but not in viral mRNAs (Kopecky-

130 Bromberg et al., 2006). Furthermore, nsp1 tightly binds to the 40S ribosomal subunit and  
131 blocks translation initiation (Kamitani et al., 2009). This dual capacity to cleave host  
132 mRNAs and directly inhibit their translation may allow SARS-CoV-2 to overcome the type  
133 I IFN response in infected cells, as has been demonstrated for SARS-CoV (Narayanan et  
134 al., 2008). On the other hand, the bulk of published research on SARS-CoV- and SARS-  
135 CoV-2-host interactions has relied on transcriptional profiling to study the immune  
136 response to infection (Blanco-Melo et al., 2020, Butler et al., 2020, Menachery et al., 2014,  
137 Mitchell et al., 2013, Wilk et al., 2020, Zhou et al., 2020). Such approaches may not fully  
138 capture the host immune response to infection, in the face of viral mechanisms that block  
139 host mRNA translation.

140

141 Here, we have conducted in-depth ribosome profiling studies to gain insight into the role  
142 of translational regulation in SARS-CoV-2 replication and the resulting host responses.  
143 We found that ribosome occupancy on viral mRNAs was temporally regulated and partly  
144 dependent on RNA abundance. In addition, ribosomes engaged with novel translation  
145 initiation sites (TIS) and other potential regulatory elements on SARS-CoV-2 RNAs. Viral  
146 mRNAs encoding E, S and ORF1ab were more efficiently translated than other viral  
147 mRNAs, but the overall translation efficiency of viral mRNAs was not substantially different  
148 than cellular mRNAs. In addition, we found that ribosomes were depleted rather than  
149 enriched on the SARS-CoV-2 frameshifting site and SARS-CoV-2 frameshifting was more  
150 efficient than HIV-1. Remarkably, while numerous inflammatory chemokines, cytokines  
151 and ISGs were upregulated transcriptionally in SARS-CoV-2-infected cells, we found that  
152 many were not efficiently translated. Overall, our study defines the translational landscape  
153 of SARS-CoV-2-infected cells, revealing novel events that may promote viral replication  
154 and disarm host immune responses at the level of mRNA translation.

155

156 **RESULTS**

157

158 ***Ribosome profiling reveals key features of SARS-CoV-2 translational program***

159 To study the relationship between transcriptionally and translationally regulated events at  
160 early and late phases of SARS-CoV-2 infection, Vero E6 cells infected at low and high  
161 multiplicity of infection (MOIs, 0.1 and 2 plaque forming units [PFU]/cell, respectively))  
162 were monitored by RNA-seq and ribo-seq during the course of infection (**Fig. 1A**). Viral  
163 antigen staining of infected cells revealed that the majority of the cells were infected by 24  
164 hpi for low MOI and by 12 hpi for high MOI infections (**Fig. S1A, S1B**). High quality  
165 duplicate sequencing libraries with favorable mapping statistics were generated (**Tables**  
166 **S1-S4**). The quality of each ribo-seq library was assessed as follows. First, the length of  
167 distribution of ribo-seq reads that mapped to cellular and viral transcriptomes were within  
168 the expected range of ribosome protected fragments (**Fig. S2A, S2B, S3A, S3B**) (Ingolia  
169 et al., 2012, Ingolia et al., 2009). We noted that in one experiment read lengths trended to  
170 be longer likely due to lesser extent of nuclease digestion (**Fig. S3A, B**). Second, the  
171 majority of ribo-seq reads mapped to coding sequences and 5' UTRs, with clear reduction  
172 in the fraction of reads mapping to 3'UTRs when compared to RNA-seq experiments done  
173 in parallel (**Fig. S2C, Fig. S4**). Third, mapped ribosome footprints within the CDSs were  
174 enriched in fragments that align to the translated frame (**Fig. S2D, Fig. S5**).

175

176 For low MOI infections, ~50% of the uniquely mapping RNA-seq reads were derived from  
177 SARS-CoV-2 mRNAs by 24 hours post infection (hpi) (**Fig. 1B**). By 48 hpi >80% of the  
178 uniquely mapping reads were viral (**Fig. 1B**) demonstrating that viral mRNAs quickly  
179 dominate the total cellular mRNA pool. The percentage of SARS-CoV-2-derived mRNAs  
180 did not increase further at 72 hpi (**Fig. 1B**), partly due to virus-induced cytotoxicity.  
181 Comparatively, a smaller percentage of ribosome-associated mRNAs were derived from

182 SARS-CoV-2, approximating 20 to 40% at early and late time points in infection,  
183 respectively (**Fig. 1C**). Despite their relative abundance in the cytosol, viral RNAs were  
184 not specifically enriched in ribosome-bound pool. As we observed significant levels of  
185 cytotoxicity at 72 hpi, we focused our analyses on the earlier 24 and 48 hpi time points.

186

187 Plotting of RNA-seq reads on the viral genome demonstrated that N-derived sgRNAs were  
188 highly abundant throughout infection (**Fig. 1D-E, and S5**), a finding consistent with  
189 previous RNA-seq studies (Kim et al., 2020, Huang et al., 2020). Expectedly, the majority  
190 of these reads were derived from positive sense viral mRNAs, albeit substantially lower  
191 copies of anti-sense transcripts were also detectable (**Fig. S6**). Furthermore, ribosomes  
192 were enriched on N mRNAs, with a high peak surrounding the translation start site, at 24  
193 hpi (**Fig. 1D**). As expected from the low abundance of ORF10 encoding sgRNAs, we noted  
194 that ribosome occupancy fell abruptly after the N stop codon, although footprints were still  
195 detectable within the ORF10 coding sequence with an average read count of 136 per  
196 nucleotide. A second high ribosome occupancy site was observed within the M ORF at 24  
197 hpi, again with a distinct peak around the translation start site (**Fig. 1D**). ORFs downstream  
198 from S also were bound by ribosomes, albeit at lower levels (**Fig. 1D**). By 48 hpi, we found  
199 that high ribosome occupancy sites shifted from the N ORF to upstream ORFs, and  
200 numerous high ribosome occupancy sites were observed throughout the viral RNAs (**Fig.**  
201 **1E**). In particular, at 48 hpi, ORF1a and ORF1b translation appeared to be more efficient,  
202 considering the low level of mRNA abundance observed by RNA-seq (**Fig. 1E and S7B**).  
203 Ribosome occupancy within ORF1a and ORF1b was non-uniform and did not correlate  
204 with proteolytic cleavage events occurring within these polyproteins (**Fig. S7A-B**).  
205 Ribosome footprints were also observed on antisense transcripts (**Fig. S8**), albeit fairly  
206 infrequently and with read length distributions not matching those expected from ribosome  
207 protected fragments (**Fig. S2E**).



208

209 Similar to other CoVs, SARS-CoV-2 frameshifting is thought to be mediated by the  
210 conserved heptanucleotide slippery sequence (UUUAAAC) and a RNA pseudoknot  
211 downstream from it spanning nucleotides 13408-13540 (**Fig. 1F**). Of note, ribosome  
212 occupancy was fairly low within the frameshifting site but increased immediately following  
213 it (**Fig. 1G**), suggesting a relatively high efficiency of frameshifting. Length distribution of  
214 reads that mapped to ORF1ab was similar to other virally mapping reads (**Fig. S2F**) and  
215 within the expected range of ribosome-protected fragments. Average ribosome density  
216 within ORF1b was modestly lower, and comparison of ribosome densities between ORF1a  
217 and ORF1b revealed a frameshifting efficiency of %63 (+/- 3%), in line with published  
218 reports of frameshifting efficiency with SARS-CoV-2 as well as other coronaviruses  
219 (Irigoyen et al., 2016, Dinan et al., 2019, Finkel et al., 2020). In addition, we noted that  
220 ribosome density was also depleted ~100 nucleotides upstream of the frameshifting site  
221 (**Fig. 1G**). Based on this, we speculate that the pseudoknot structure may sterically hinder  
222 translating ribosomes upstream of the frameshifting site or that the RNA structure may  
223 extend to upstream sequences.

224

### 225 ***Kinetics of early translationally regulated events in SARS-CoV-2 replication***

226 To identify early translationally regulated events in SARS-CoV-2 replication, we conducted  
227 similar experiments in Vero E6 cells infected at a higher MOI but monitored at earlier times  
228 in infection (**Fig. 1A, S1B**). At 2 hpi, only a small fraction of mRNAs was derived from  
229 SARS-CoV-2 RNAs, though by 12 hpi, nearly 80% of the total mRNA pool was viral (**Fig.**  
230 **2A**). Viral RNAs were more abundant in the ribosome bound pool at 2 hpi and by 12 hpi  
231 ~50% of the ribosome-protected fragments contained viral sequences (**Fig. 2B**). As  
232 before, viral RNAs did not appear to be specifically enriched in the ribosome-bound pool  
233 (**Fig. 2B**).

234

235 N-derived sequences were the most abundant viral RNA species throughout the infection  
236 (**Fig. 2C-G**) and consistent results were obtained from replicate experiments (**Fig. S9-**  
237 **S10**). Analysis of ribosome footprints on viral RNAs at 2 hpi revealed the presence of a  
238 high occupancy site (**Fig. 2C, Fig. S11A, and S12A**), which accounted for the majority of  
239 ribo-seq reads derived from viral RNAs (**Fig. 2B**). This region, spanning nucleotides  
240 27371-27457 is located between ORF6 and ORF7, is not fully conserved between SARS-  
241 CoV-2 and SARS-CoV (**Fig. S13A**), and is predicted to form a structured hairpin loop with  
242 high probability (**Fig. S13B**). Reads that mapped to this region displayed a length  
243 distribution around 29-34 nt, suggesting that they are authentic ribosome protected  
244 fragments rather than aberrant products of PCR or digestion bias. High ribosome  
245 occupancy in this region was maintained throughout the infection (**Fig. S13C**) and across  
246 biological replicates (**Fig. S11A and S12A**).

247

248 Following a high MOI infection, ribosome occupancy on viral RNAs increased significantly  
249 by 6 hpi, featuring N and M coding mRNAs constituting as the most frequently translated  
250 RNAs (**Fig. 2D, Fig. S11B, and S12B**). Ribosome occupancy across viral RNAs increased  
251 further by 12 hpi (**Fig. 2E, S11C and S12C**) and remained high during the remainder of  
252 infection (**Fig. 2F, 2G, S11D, S11E, S12D and S12E**). Ribosome footprints were non-  
253 uniform with numerous high and low frequency binding sites observed reproducibly across  
254 viral RNAs (**Fig. 2C-G, S11, S12**). Of note, the frameshifting element had a generally low  
255 ribosome density compared to the surrounding sequences throughout the infection (**Fig.**  
256 **S14A-E**). Ribosome occupancy was low upstream of the frameshifting site (**Fig. S14A-E**),  
257 again suggesting the possibility of an alternative RNA structure and/or steric hindrance by  
258 the frameshifting element on translating ribosomes. Once again, read length distribution  
259 ribo-seq reads mapping to ORF1ab was similar to other virally mapping reads (**Fig. S14F**

260 **vs. Fig. S3B**). Comparison of read density distribution between ORF1a and ORF1b  
261 indicated a relatively high efficiency of frameshifting ranging from %75 to %100 throughout  
262 the course of infection (**Fig. S14G**).

263

264 Analogous to SARS-CoV-2, HIV-1 also utilizes -1 ribosomal frameshifting, in this case for  
265 generation of the Gag-Pol polyprotein (Jacks et al., 1988, Wilson et al., 1988). HIV-1  
266 frameshifting is regulated by a slippery sequence followed by a structured hairpin loop  
267 (Mouzakis et al., 2013, Staple and Butcher, 2005). To compare the frameshifting efficiency  
268 of SARS-CoV-2 to HIV-1, we next performed paired ribo-seq and RNA-seq experiments  
269 in HIV-1-infected CD4+ T-cells isolated from two independent donors (**Table S5 and S6**).  
270 Length distribution of ribo-seq derived reads that mapped to cellular (**Fig. S15A**) and viral  
271 (**Fig. S15B**) mRNAs were within the expected range of ribosome-protected fragments. In  
272 addition, ribo-seq reads that mapped to cellular mRNAs had a 3-nt periodicity in frame  
273 with annotated CDSs (**Fig. S15C**) and were largely depleted off of 3' UTRs (**Fig. S15D**),  
274 highlighting the high quality of the ribo-seq experiments.

275

276 We found that, in contrast to SARS-CoV-2, ribosome occupancy was high within the HIV-  
277 1 frameshifting element (**Fig. S16B**) but dropped substantially 3' to it and remained low  
278 throughout the Pol ORF (**Fig. S16A and 16C**). This suggests that ribosomes may pause  
279 and accumulate within the frameshifting site but only a small fraction of them continue  
280 translating into the Pol ORF, a finding that agrees with prior estimates of low (5-10%) HIV-  
281 1 frameshifting efficiency (Biswas et al., 2004, Dulude et al., 2006, Shehu-Xhilaga et al.,  
282 2001, Baril et al., 2003, Jacks et al., 1988). Thus, we conclude that programmed ribosomal  
283 frameshifting is regulated through distinct mechanisms between HIV-1 and SARS-CoV-2,  
284 despite the similar structural elements that regulate this process.

285

286 We next tested whether SARS-CoV-2 can utilize alternative translation initiation, which is  
287 increasingly recognized as a key post-transcriptional regulatory mechanism (Kwan and  
288 Thompson, 2019, James and Smyth, 2018). To do so, ribo-seq experiments were  
289 performed as in Fig. 2 but in the presence of harringtonine, which results in the  
290 accumulation of ribosomes at translation initiation sites. In addition to accumulation of  
291 ribosomes at the canonical start codons, harringtonine treatment resulted in accumulation  
292 of ribosomes at alternative translation initiation sites during the course of infection, albeit  
293 at generally lower frequencies. For example, at 6 hpi, an internal noncanonical start codon  
294 'UUG' within M ORF was utilized at ~30% of the time, predicted to result in an out-of-frame  
295 peptide of 53 amino acids long (**Table S7**). An alternative translation initiation codon 'AGG'  
296 at 21868 nt appeared to be utilized within S at 6, 12 and 24 hpi, which would result in a  
297 short 18 amino acid peptide (**Table S7**). Finally alternative translation initiation sites were  
298 observed within M, resulting in an out-of-frame peptide and a truncated version of M  
299 (**Table S7**). Together, these results provide the high resolution map of ribosomes on viral  
300 mRNAs during different stages of infection and reveal key sequence and structural  
301 elements that may influence SARS-CoV-2 translational program.

302

### 303 ***Ribo-seq in primary HBECs reveal a similar SARS-CoV-2 translational program***

304 To corroborate these findings in a more relevant cell culture system, we performed ribo-  
305 seq studies in primary human bronchial epithelial cells (HBEC) grown at air-liquid  
306 interface. Cells inoculated at an MOI of 0.5 were processed for RNA-seq and ribo-seq at  
307 6, 24, 48 and 72 hpi. A parallel set of experiments were done at MOI of 1 and followed  
308 during a shorter time course. In contrast to Vero cells, the progression of infection in  
309 HBECs was relatively slow and a small percentage of the cells were infected by 24 hpi  
310 (not shown). Despite some donor-to-donor variation (as expected from primary cell culture  
311 models), SARS-CoV-2 spread was visible by 72 hpi as evident in the presence of

312 numerous infection foci (**Fig. S17A**). By 96 hpi, a large fraction of ciliated cells expressing  
313 ACE2 were infected (**Fig. S17B, S17C**). These findings were largely corroborated upon  
314 infection of HBECs with a NeonGreen reporter virus (Xie et al., 2020) (**Fig. S17D**). In line  
315 with this, the amount of newly synthesized viral RNAs was low at 6 hpi, although by 24 hpi  
316 numerous virally derived sequences (as assessed by RNA-seq) were present (**Table S8**  
317 **and S9**). Similar to experiments done in Vero E6 cells (**Fig. 1 and 2**), the majority of these  
318 sequences were derived from subgenomic viral mRNAs coding for N and to a lesser extent  
319 upstream ORFs including M, ORF6, ORF7 and ORF8 (**Fig. 3A**). As with previous  
320 experiments, length distribution of ribo-seq reads mapping to cellular and viral mRNAs  
321 matched the size expected from ribosome-protected fragments (**Fig. S18A**), most ribo-  
322 seq reads mapped to CDSs and 5' UTRs but not 3' UTRs (**Fig. S18B**) and were enriched  
323 in fragments that align to the translated frame (**Fig. S19**), highlighting the high quality of  
324 ribo-seq libraries. The lower permissiveness of these cells to infection resulted in few viral  
325 RNAs bound to ribosomes at 6 hpi (**Table S8**). Ribosomes bound by viral RNAs were  
326 readily detected at 24, 48, and 72 hpi, with N and M ORFs being the most frequently  
327 translated (**Fig. 3B-D**). We found distinct accumulation of ribosomes within N, M and  
328 ORF1a translation start sites as well as 5' end of ORF1a (**Fig. 3B-D**). Overall, these results  
329 suggest the presence of a similar gene expression cascade in the primary HBECs in  
330 comparison to Vero E6 cells.

331

### 332 ***Inflammatory and innate immune mRNAs are inefficiently translated in SARS-CoV-*** 333 ***2 infected cells***

334 Several studies have focused on the transcriptional landscape of innate responses to  
335 SARS-CoV-2 (Blanco-Melo et al., 2020, Butler et al., 2020, Menachery et al., 2014,  
336 Mitchell et al., 2013, Wilk et al., 2020, Zhou et al., 2020). However, currently there is little  
337 evidence as to whether transcriptionally induced mRNAs are actually translated in the

338 setting of a virus that can in principle induce translational arrest (Nakagawa et al., 2016)  
339 and ISGs (e.g. IFIT1 and PKR) that can inhibit mRNA translation (Li et al., 2015). Using  
340 ribo-seq, we next assessed how cells respond to SARS-CoV-2 infection at a translational  
341 level.

342

343 Paired RNA-seq and ribo-seq data (for high MOI infections of Vero E6 cells) obtained from  
344 independent and reproducible experiments (**Fig. S20**) were analyzed for differential gene  
345 expression patterns. As early as 2 hpi, we found transcriptional upregulation of several  
346 chemokine ligands (i.e. CXCL1, CXCL3, CXCL8) and transcription factors involved in cell  
347 cycle regulation and induction of inflammation (i.e. NR4A3 and EGR3) (**Fig. 4A, S21A,**  
348 **S22A**). In contrast, we noted a general trend in RNA downregulation (**Fig. 4A**), which  
349 persisted throughout the infection (**Fig. 4B-C, and S23**). 6 hpi timepoint was also marked  
350 by upregulation of chemokine ligands (CXCL1, CXCL3, CXCL8, CXCL11) (**Fig. 4B, S21A,**  
351 **S22A**) and by 12 hpi numerous ISGs (e.g. IFIT family members, MX1, IFI44), IL1A and  
352 IFN- $\lambda$  were also upregulated (**Fig. 4C, S21A, S22A**). Remarkably, the majority of these  
353 transcript level changes were not apparent in Ribo-seq data (**Fig. 4D-F and S21A, S22A**),  
354 suggesting that mRNAs encoding genes in the host defense responses may not be  
355 efficiently translated. Of note, this pattern was not global. For example, EGR1, EGR3 and  
356 IFIH1, were induced at equivalent levels both in RNA-seq and ribo-seq experiments (**Fig.**  
357 **S24**). This pattern grossly continued at 24 and 48 hpi, though by 48 hpi upregulated genes  
358 were primarily associated with cell death, likely reflecting viral and immune-mediated  
359 cytotoxicity (**Fig. S21, S22, S25**).

360

361 Time-course gene set enrichment analysis corroborated the differences between  
362 transcriptional and translational responses in infected Vero cells. For example, numerous  
363 sets of genes involved in chemokine, cytokine and interferon signaling were upregulated

364 at 2 hpi in the RNA-seq data set (**Fig. 5A**), but these changes were not evident in the ribo-  
365 seq data set (**Fig. 5B**). Although at later time points both RNA-seq and ribo-seq data sets  
366 were enriched in gene sets related to interferon responses, inflammatory responses, IL2  
367 and IL6 signaling, these responses appeared to be lower in magnitude for ribo-seq data,  
368 with fewer genes enriched in each family and a significant delay in kinetics (**Fig. 5A-B**).  
369 Together, these findings suggest that immune response genes are translationally  
370 repressed and their expression significantly delayed in infected cells.

371

372 Many of these findings held consistent for the low MOI infections. Analysis of independent  
373 and reproducible RNA-seq (**Fig. S26A**) and Ribo-seq (**Fig. S26B**) experiments revealed  
374 that transcription factors ATF3 and EGR1, key regulators of inflammatory responses, were  
375 upregulated at 24 hpi alongside with numerous chemokine ligands (i.e. CXCL1, CXCL8,  
376 CXCL10) and interleukin 6 (**Fig. 6A**). Of note, despite the fact that Vero cells are known  
377 to be deficient in type-I IFN production, we noted the upregulation of numerous ISGs (i.e.  
378 IFIT1, IFIT2, IFIT3) as well as IFN-lambda at 24 hpi (**Fig. 6A**). The 48 hpi timepoint was  
379 marked by upregulation of genes involved in cell cycle regulation and apoptosis (i.e. FOS,  
380 NR4A3), as well as inflammatory cytokines such as IL-31 and ISGs including OASL (**Fig.**  
381 **6B**). In line with our above observations, the great majority of the transcriptionally  
382 upregulated genes were not translationally upregulated at 24 hpi (**Fig. 6C**) and 48 hpi  
383 (**Fig.6D**). Interleukins IL11 and IL1A stood out as immune-related genes that were  
384 translationally upregulated at 24 and 48 hpi, respectively (**Fig. 6C, D**)

385

386 Although a small percentage of cells in the primary airway culture system described above  
387 were infected, analysis of differentially expressed transcripts revealed significant and  
388 consistent trends in gene expression profiles upon infection. For example, we found that  
389 gene sets involved in inflammatory response, interferon alpha, interferon gamma, IL2 and

390 IL6 signaling were upregulated as early as 6 hpi by RNA-seq, despite the lack of  
391 observable virus replication (**Fig. S27A**). At 48 hpi, the transcriptional landscape was  
392 marked by the upregulation of other sets of genes involved in IL2 and IL6 signaling,  
393 inflammation, complement and hypoxia, amongst others (**Fig. S27A**). Many of these  
394 responses were tuned down or non-existent in the ribo-seq data set (**Fig. S27B**),  
395 suggesting that mRNA translation may similarly be repressed in this more relevant cell  
396 culture system.

397

### 398 ***Comparison of SARS-CoV-2 and host mRNA translation efficiencies***

399 We next assessed the translational efficiency of cellular host response genes in infected  
400 cells and how this compared to viral mRNA translation. In mock-infected cells, most  
401 cellular mRNAs were translated at levels proportional to their mRNA abundance (**Fig. 7A**).  
402 Notable outliers included mRNAs encoding for ribosomal subunits, which were translated  
403 less efficiently as observed before (Riba et al., 2019), and DDX25 RNA helicase, which  
404 constituted one of the most efficiently translated mRNAs (**Fig. 7A**). The translational  
405 efficiency of viral mRNAs was not substantially different than the majority of cellular  
406 mRNAs with ORF1AB, S and E mRNAs translated at a modestly higher efficiency and the  
407 remainder of viral mRNAs at a lower efficiency than average, a pattern that did not vary  
408 with progression of infection (**Fig. 7B-F**). Thus, the high abundance of viral mRNAs, as  
409 opposed to a specific regulated mechanism, likely ensures the abundance of viral proteins.  
410 Consistent with our earlier observations, we found that the differentially expressed  
411 chemokine ligands and ISGs generally were translated less efficiently (**Fig. 7C-D and**  
412 **S14**). Of note numerous cellular genes with unknown functions were translationally  
413 upregulated in infected cells (**Fig. 7B-F**).

414

## 415 **DISCUSSION**



416 Here we utilized ribosome profiling (ribo-seq) coupled with RNA-seq to study the  
417 translational events that regulate viral gene expression and host responses over the  
418 course of SARS-CoV-2 infection. SARS-CoV-2 replicates rapidly, with viral RNAs  
419 constituting the great majority of the total mRNA pool soon after infection. Our data show  
420 that viral mRNA abundance is the main determinant of viral protein expression and SARS-  
421 CoV-2 mRNAs sequester ribosomes from the translating pool by competition, simply  
422 outnumbering the host counterparts. Notwithstanding certain viral mRNAs (i.e. those  
423 encoding S, E and ORF1ab) were translated modestly more efficiently translated than  
424 others. While the overall conclusions are similar, another study found that ORF1ab was  
425 less efficiently translated compared with other viral mRNAs (Finkel et al., 2020), which we  
426 ascribe to possible differences in read depth (with our study having substantially higher  
427 read depth within ORF1ab), RNA-seq approaches and infection conditions (5-7 hpi in  
428 (Finkel et al., 2020) vs. a more extensive time course analysis done in our study). In  
429 addition, we show that ribosome occupancy on viral RNAs is uneven, changes during the  
430 course of infection, and alternative translation initiation sites and RNA structural elements  
431 may be utilized. Analysis of mRNA translation in infected cells uncovered that  
432 inflammatory and innate responses can be dampened by inefficient mRNA translation in  
433 SARS-CoV-2 –infected cells. Together, our study provides an in-depth picture of  
434 translationally regulated events in SARS-CoV-2 replication and reveal that impairment of  
435 host mRNA translation may allow SARS-CoV-2 to evade host immunity.

436

437 We observed that, in contrast to HIV-1, SARS-CoV-2 RNA employs a highly efficient  
438 frameshifting strategy to facilitate virus replication. Ribosomal frameshifting requires a  
439 heptanucleotide slippery sequence and a RNA pseudoknot, generally a H-type, positioned  
440 six to eight nucleotides downstream (Giedroc and Cornish, 2009). Multiple models for  
441 ribosomal frameshifting posit that the ribosome pauses at the slippery sequence upon

442 encountering the pseudoknot, which is resistant to unwinding (Farabaugh, 1996, Dinman,  
443 2012). While paused, ribosomes either stay in-frame or slip -1 nt before resuming  
444 translation. A corollary of this notion is that the stimulatory structure, in turn, enhances  
445 frameshifting efficiency by promoting ribosomal pausing. In line with this, we observed low  
446 ribosome occupancy in the SARS-CoV-2 frameshifting site (**Fig. 1G and S14**). Notably,  
447 ribosome pausing extended 100 nucleotides upstream of the frameshifting site,  
448 suggesting an alternative frameshifting structure that includes upstream sequences or  
449 steric hindrance imposed by the pseudoknot structure. Ribosome density downstream of  
450 the frameshifting site within the ORF1b was remarkably high, suggesting high efficiency  
451 of frameshifting in spite of ribosomal pausing.

452 The behavior of ribosomes was drastically different between the SARS-CoV-2 and HIV-1  
453 frameshifting sites. In contrast to SARS-CoV-2, ribosomes accumulated within the HIV-1  
454 frameshifting element and only a small fraction of them continued into the Pol ORF,  
455 suggesting a significantly lower efficiency of frameshifting. We hypothesize that both  
456 sequence-specific and structural features contribute to SARS-CoV-2 frameshifting  
457 efficiency. It is thought that HIV-1 has a particularly slippery sequence (UUUUUUA) as  
458 compared to SARS-CoV-2 (UUUAAAC), which may underlie this difference (Giedroc and  
459 Cornish, 2009). In addition, structures downstream of the slippery sequence may have an  
460 impact (Plant and Dinman, 2008). For example, the HIV-1 frameshifting element is  
461 predicted to have a simpler pseudoknot (Chang et al., 1999, Parkin et al., 1992, Brierley  
462 and Dos Ramos, 2006, Huang et al., 2014) or hairpin loop structure (Mouzakis et al., 2013,  
463 Staple and Butcher, 2005). In particular, previous studies suggest that frameshifting  
464 efficiency positively correlates with the mechanical stability and thermodynamic stability  
465 of the pseudoknot and stem loop, respectively (Hansen et al., 2007, Chen et al., 2009,  
466 Bidou et al., 1997). In addition, host proteins can also affect frameshifting. Of note, an

467 interferon-stimulated gene (ISG) product, known as C19orf66 (Shiftless), has recently  
468 been demonstrated to impair HIV-1 replication through inhibition of HIV-1 programmed  
469 frameshifting (Wang et al., 2019). Altogether, our data suggest that SARS-CoV-2 and HIV-  
470 1 frameshifting occurs through distinct mechanisms. It remains to be determined how  
471 distinct elements within the frameshifting site affect and whether other viral or cellular  
472 proteins are involved in modulating the frameshifting efficiencies of these viruses.

473 SARS-CoV-2 mRNA translation may be regulated by other structural elements. For  
474 example, we observed a high ribosome occupancy site that is present throughout the  
475 course of infection and located between ORF6 and ORF7 (**Fig. 2C, S13**). This site is  
476 computationally predicted to form a structured hairpin loop that may trigger ribosomal  
477 pausing during translation of subgenomic viral RNA and thus lead to the observed high  
478 ribosome occupancy (**Fig. S8**). Of note, ribosome occupancy within this region fell after  
479 harringtonine treatment, suggesting that it may serve a function other than translation  
480 initiation (not shown). While the biological role of this RNA structure is not apparent, it may  
481 play a role in regulating the relative expression of ORF6 and ORF7 likely within the context  
482 of viral subgenomic mRNAs. Other potential functions of this element include co-  
483 translational protein folding, protein targeting, or co-translational degradation of both  
484 mRNA and nascent peptide following pausing.

485

486 In addition, our study demonstrates that alternative, non-canonical translational start sites  
487 internal to several viral genes such as S, E and M, can result in truncated isoforms or short  
488 peptides (**Table S7**). While their presence still needs to be validated, this raises the  
489 question of whether viral protein isoforms may play important biological role during  
490 infection. SARS-CoV-2 infection also induced significant increase in utilization of canonical  
491 as well as non-canonical translation initiation sites from numerous cellular mRNAs (**Table**

492 **S10**), including members of the S100 family with known roles in inflammation (Bettum et  
493 al., 2014, Li et al., 2020) and virus replication (Bharadwaj et al., 2013, Liu et al., 2015,  
494 Taylor et al., 2018). These findings together emphasize the potential role of translationally  
495 regulated events that may help shape viral replication and host responses to pathogens,  
496 which may be overlooked in transcriptomics approaches.

497

498 Our study provides the first in depth picture of how host cell responses to SARS-CoV-2  
499 are regulated at a post-transcriptional level. This is of utmost importance given that several  
500 SARS-CoV proteins have been reported to suppress host translation and that numerous  
501 genes involved in innate immunity act to block mRNA translation. Such regulatory events  
502 would be completely neglected in transcriptomic screens. In fact, we observed  
503 upregulation of proinflammatory chemokines as early as 2 hpi followed by a more delayed  
504 induction of ISGs, a finding in line with previous observations in immortalized lung cell  
505 lines (Blanco-Melo et al., 2020). However, the increase in transcript abundance did not  
506 correlate with higher levels of translation and majority of them appeared to be translated  
507 at a low efficiency (**Fig. 7**).

508

509 The apparent low translation efficiency of host response mRNAs may be mediated by the  
510 SARS-CoV-2 protein nsp1, which was recently reported to associate tightly with the 40S  
511 ribosomal subunit as well as non-translating 80S ribosomes to prevent binding of capped  
512 mRNA and thus inhibit the formation of the translation initiation complex (Schubert et al.,  
513 2020), much like its SARS-CoV counterpart (Narayanan et al., 2015). In addition, there is  
514 increasing evidence that ectopic expression of Nsp1 can alter host mRNA translation (Rao  
515 et al., 2020). Our study complements these studies and provides the first published  
516 evidence on the potential inhibitory effects of Nsp1 on host mRNA translation at  
517 biologically relevant infection settings. We cannot rule out that the observed translational

518 suppression may also be contributed by the host's attempt to curb viral replication,  
519 including members of the IFIT family with known functions in translation inhibition (Hyde  
520 and Diamond, 2015, Fensterl and Sen, 2015, Reynaud et al., 2015, Daffis et al., 2010,  
521 Diamond and Farzan, 2013). A further alternative is that the translation of these mRNAs  
522 is inherently inefficient due to presence of unique 5' UTR structures. Finally, it is plausible  
523 that the relatively lower read depths obtained from ribo-seq libraries may have precluded  
524 accurate assessment of differential gene expression changes. However, we think that this  
525 is unlikely given the high level of mRNA expression for numerous innate immune genes  
526 (based on RNA-seq) and the statistical models utilized herein to assess translational  
527 suppression. Notwithstanding, future studies are warranted to empirically test these  
528 possibilities and define the mechanism of apparent innate immune suppression.

529

530 While COVID-19 pathogenesis is in part due to virus-induced destruction of infected cells,  
531 elevated production of inflammatory mediators and the virus-induced immunopathology  
532 are thought to play a big role in SARS-CoV-2-induced lung injury (Channappanavar and  
533 Perlman, 2017, Perlman and Dandekar, 2005). Our findings suggest that immune  
534 responses in actively infected cells may be dampened or delayed for SARS-CoV-2 to  
535 efficiently replicate and release viral progeny. As such, it is possible that the elevated  
536 levels of inflammatory mediators in vivo is due to infection of immune cell subsets, such  
537 as monocytes and macrophages, that are less permissive to SARS-CoV-2 but can sense  
538 and respond to infection by secretion of immune modulatory molecules (Jafarzadeh et al.,  
539 2020).

540

541 Taken together, we provide novel insight into and a rich resource on how translational  
542 regulation shapes SARS-CoV-2 replication and host responses. Our finding that induction  
543 of inflammatory and innate immune responses can be limited at the level of mRNA

544 translation provides a paradigm shifting mechanism of how SARS-CoV-2 can encounter  
545 immune responses. Modulation of viral RNA structures and proteins that regulate mRNA  
546 translation will undoubtedly provide a unique avenue for therapeutic development.

547

548 **ACKNOWLEDGEMENTS:** We would like to thank members of the Diamond lab for  
549 reagents and support. This work was supported by Washington University startup funds  
550 for SBK, R21 AI145669 to SBK and JD, National Science Foundation Graduate Research  
551 Fellowship under Grant No. DGE-1745038 to KV, Stephen I. Morse postdoctoral  
552 fellowship to MPC, Helen Hay Whitney Foundation postdoctoral fellowship to J.B.C., and  
553 the Dorothy R. and Hubert C. Moog Professorship to SLB. All NGS data (48 sets of ribo-  
554 seq and 48 sets of matching RNA-seq) are deposited in the GEO database under  
555 GSE158930.

556

557 **AUTHOR CONTRIBUTIONS:** MPC, HRV, AH, TH, SGP, JBC conducted the experiments.  
558 KT, NL, YL, WY conducted the bioinformatics analysis. HRV and SBK wrote the original  
559 manuscript with input from MSD, SLB, JD, JBC.

560

## 561 **FIGURE LEGENDS**

562 **Figure 1. Ribo-seq reveals uneven ribosome occupancy on SARS-CoV-2 RNAs**  
563 **during low MOI infection.** (A) Schematic diagram of Ribo-seq and RNA-seq experiments  
564 conducted in this study. Vero E6 cells were infected at 0.1 pfu/cell and cells were  
565 processed for RNA-seq and Ribo-seq at 24, 48 and 72 hpi. (B, C) Percentage of RNA-seq  
566 (B) and Ribo-seq (C) reads uniquely mapping to SARS-CoV-2 and cellular transcripts at  
567 the indicated time points post infection. Individual data points indicate biological replicates.  
568 (D, E) Ribo-seq and RNA-seq reads (counts) along the viral genome at 24 hpi (D) and 48  
569 hpi (E). Schematic diagram of SARS2 genome features shown below is co-linear. Red

570 arrows denote translation initiation sites. (F) Predicted secondary structure of the  
571 frameshifting site is depicted. (G) Ribo-seq read counts at 48hpi within the SARS2  
572 frameshifting site. The position of the frameshifting element is indicated with the red  
573 rectangle.

574

575 **Figure 2. Changes in ribosome occupancy on the SARS-CoV-2 genome during high**  
576 **MOI infection.** Vero E6 cells were infected at 2 pfu/cell and processed for RNA-seq and  
577 Ribo-seq at 2, 6, 12, 24 and 48 hpi. (A, B) Percentage of RNA-seq (A) and Ribo-seq (B)  
578 reads uniquely mapping to SARS-CoV-2 and cellular transcripts at the indicated time  
579 points post-infection. Individual data points indicate biological replicates. (C-G) Ribo-seq  
580 and RNA-seq reads (counts) mapping to the viral genome at 2 hpi (C), 6 hpi (D), 12 hpi  
581 (E), 24 hpi (F) and 48 hpi (G) are shown. Schematic diagram of SARS2 genome features  
582 illustrated below in co-linear.

583

584 **Figure 3. Ribo-seq experiments in primary HBEC cultures grown at ALI.** HBECs  
585 grown at ALI were infected with SARS-CoV-2 at a MOI of 0.5 i.u./cell and processed for  
586 RNA-seq at 24 hpi (A) and ribosome profiling at 24 (B), 48 (C) and 72 (D) hpi. Ribo-seq  
587 reads (counts, y-axis) along the viral genome (x-axis) is shown. Schematic diagram of  
588 SARS2 genome features shown below is co-linear.

589

590 **Figure 4. Differentially transcribed and translated host genes in SARS-CoV-2-**  
591 **infected cells (high MOI).** Vero E6 cells were infected at 2 pfu/cell and processed for  
592 RNA-seq at 2 hpi and Ribo-seq at 2 hpi (A, D), 6 hpi (B, E), and 12 hpi (C, F). Heatmaps  
593 show the log<sub>2</sub> counts per million mapped reads (cpm) of the top differentially expressed  
594 genes (FDR<0.05, fold change>2) derived from two independent experiments. Scale of  
595 each graph is shown below.

596

597 **Figure 5. Expression dynamics of differentially transcribed cellular mRNAs in**  
598 **response to SARS-CoV-2 infection.** Time-course gene set analysis (TcGSA) was  
599 performed on the RNA-seq (A) and Ribo-seq (B) data derived from the above experiments.  
600 The heatmap shows an under (blue) or an over (red) expression for each significant gene  
601 set. The numbers next to each gene set indicate a particular subset of genes which trend  
602 differently from other genes within the same gene set.

603

604 **Figure 6. Differentially transcribed and translated host genes in SARS-CoV-2-**  
605 **infected cells (low MOI).** Vero E6 cells were infected at 0.1 pfu/cell and cells were  
606 processed for RNA-seq (A, B) and Ribo-seq (C, D) at 24 and 48 hpi. Heatmaps show the  
607 counts per million mapped reads (cpm) of the top differentially expressed genes  
608 (FDR<0.05, fold change>2) derived from two independent experiments. Scale of each  
609 graph is shown below.

610

611 **Figure 7. Comparison of SARS-CoV-2 and host mRNA translation efficiencies.**  
612 Translation efficiencies of viral and host mRNAs were assessed as described in Materials  
613 and Methods. Plots show translational efficiencies of host mRNAs in mock infected cells  
614 (A), 2 (B), and 48hpi (C) as these samples all had low or zero viral replication, as well as  
615 viral and host mRNAs in infected cells at 6 hpi (C), 12 hpi (D) and 24 hpi (E). Translational  
616 efficiencies of key differentially expressed genes derived from RNA-seq and Ribo-seq are  
617 represented by orange circles. Reference genes with notably high and low translational  
618 efficiencies are represented by blue circles. Viral genes are represented by red circles.

619

620

621



622 **MATERIALS AND METHODS**

623 **Chemicals and reagents.** Standard laboratory chemicals were obtained from reputable  
624 suppliers such as Sigma-Aldrich. Cycloheximide (CHX) was obtained from Sigma,  
625 dissolved in ethanol and stored at -20°C. Harringtonine (HT) was purchased from LKT  
626 Laboratories, Inc., resuspended in DMSO and stored in aliquots of 2 mg/mL at -20°C.

627

628 **Plasmids and viruses.** A proviral plasmid encoding the full length HIV-1 genome was  
629 obtained from NIH AIDS Reagents. HIV-1 stocks were generated by transfection of  
630 Human embryonic kidney cell line, HEK293T, with proviral plasmids and collection of cell  
631 culture supernatants two days after. Viruses were treated by DNase to avoid plasmid  
632 carryover and concentrated by Lenti-X concentrator. HIV-1 stocks were titered on TZM-bl  
633 cells by conventional methods. CD4<sup>+</sup> T-cells activated for 4-5 days were used for HIV-1  
634 infections. SARS-CoV-2 strain 2019-nCoV/USA-WA1/2020 was obtained from Natalie  
635 Thornburg at the Centers for Disease Control and Prevention (CDC), propagated in Vero  
636 CCL-81 cells and titrated on Vero E6 cells by plaque-forming assays.

637

638 **Cells and infections.** HEK293T and TZM-bl cells were obtained from ATCC and NIH  
639 AIDS Reagent Program respectively and were maintained in Dulbecco's Modified Eagle's  
640 Medium (DMEM) (high glucose), supplemented with 10% fetal bovine serum (FBS) in a  
641 humidified incubator at 37°C with 5% CO<sub>2</sub>. For isolation of primary CD4<sup>+</sup> T-cells, buffy  
642 coats (from anonymous healthy blood donors from Mississippi Blood Center) were  
643 separated by Ficoll and CD4<sup>+</sup> T-cells purified using RosetteSep Human CD4<sup>+</sup> T-cell  
644 enrichment kit (STEMCELL Technologies). CD4<sup>+</sup> T-cells cells were maintained in Roswell  
645 Park Memorial Institute 1640 medium (RPMI) supplemented with 10% heat-inactivated  
646 FBS and L-glutamine. Activation of CD4<sup>+</sup> T cells was achieved by addition of 25 U/ml of  
647 interleukin-2 (IL-2) and CD4<sup>+</sup> T-cell activation Dynabeads (Life Technologies). CD4<sup>+</sup> T-

648 cells activated for 4-5 days were used for HIV-1 infections. Vero CCL-81 and Vero E6  
649 were cultured in DMEM supplemented with 10% FBS and 10 mM HEPES pH 7.4. For  
650 SARS-CoV-2 infections, Vero E6 cells were incubated with SARS-CoV-2 inoculum in  
651 DMEM-supplemented with 2% FBS for an hour in a humidified incubator at 37°C, after  
652 which the initial inoculum was removed and replaced by cell culture media.

653

654 Primary human bronchial epithelial cells (HBECs) grown at air-liquid interface (ALI).  
655 Human airway epithelial cells were isolated from surgical excess of tracheobronchial  
656 segments of lungs donated for transplantation as previously described and were exempt  
657 from regulation by US Department of Health and Human Services regulation 45 Code of  
658 Federal Regulations Part 46 (Horani et al., 2012). Tracheobronchial cells were expanded  
659 in culture, seeded on supported membranes (Transwell; Corning, Inc.), and differentiated  
660 using ALI conditions as detailed before (You et al., 2002, Horani et al., 2018).

661

662 **Immunofluorescence.** Infected Vero E6 cells and HBECs were fixed with 4%  
663 paraformaldehyde for 20 min at room temperature, followed by permeabilization using  
664 0.5% Tween-20 in PBS for 10 min. Cells were blocked with 1% bovine serum albumin  
665 (BSA) and 10% FBS in 0.1% Tween-20 PBS (PBST) for 1 h prior to staining with a rabbit  
666 polyclonal anti SARS-CoV-2 nucleocapsid antibody (Sino Biological Inc. catalog # 40588-  
667 T62) diluted 1:500 and incubated overnight at 4°C. The following day, cells were stained  
668 with an Alexa Fluor 488-conjugated goat anti-rabbit secondary antibody (Invitrogen) at  
669 1:1000 dilution, counter-stained with DAPI and imaged by microscopy.

670 *RNA in situ hybridization.* Primary-culture human airway epithelial cells were fully  
671 differentiated at air-liquid interface on supported plastic membranes (Transwell, Corning).  
672 Cells were fixed by immersion of the Transwell membrane in methanol:acetone (50:50%

673 volume) at -20 °C for 20 min followed by 4% paraformaldehyde at room temperature for  
674 15 min. Cells were washed three times with phosphate buffered saline (PBS) and stored  
675 at 4 °C. Prior to probing for vRNA, membranes containing cells were cut from plastic  
676 supports, divided into 4 pieces, and placed in a fresh 48-well plate. RNA detection was  
677 performed using the manufacturer protocol for RNAscope fluorescent in situ hybridization  
678 (RNAscope Multiplex Fluorescent v2 Assay kit, Advanced Cell Diagnostics). Briefly, cells  
679 on membranes were treated with 3% hydrogen peroxide for 10 min at room temperature,  
680 washed with distilled water, then treated with protease III solution, diluted 1:15 in PBS, for  
681 10 min in a humidified hybridization oven at 40 °C. The cells were then washed with PBS  
682 and incubated for 2 hr at 40 °C with manufacturer designed anti-sense probes specific for  
683 SARS-CoV-2 positive strand S gene encoding the spike protein (RNAscope Probe-V-  
684 nCoV2019-S, cat# 848561) or ORF1ab (RNAscope Probe-V-nCoV2019-orf1ab-O2-  
685 sense-C2 cat # 854851-C2). The probes were visualized according to the manufacturers'  
686 instructions by incubation with RNAscope amplifiers, horseradish peroxidase, and  
687 fluorescent label (Opal fluorophores, Perkin-Elmer). Membranes were mounted on glass  
688 slides using anti-fade medium containing DAPI (Fluoroshield, Sigma-Aldrich). Images  
689 were obtained using a 5000B Leica microscope equipped with a charge-coupled device  
690 camera (Retiga 200R) interfaced with QCapture Pro software (Q Imaging).

691

692 **Ribosome profiling.** Ribosome profiling (Ribo-seq) was performed as described before  
693 with the following modifications (Ingolia et al., 2009, Ingolia et al., 2012). Mock- and HIV-  
694 1- or SARS-CoV-2-infected cells were treated with complete cell culture media  
695 supplemented with 0.1 mg/mL CHX for 1 min at room temperature followed by one round  
696 of wash in ice-cold PBS supplemented with 0.1 mg/mL CHX. Cells were lysed in 1X  
697 mammalian polysome lysis buffer (20 mM Tris·HCl (pH 7.4), 150 mM NaCl, 5 mM MgCl<sub>2</sub>,  
698 1% Triton X-100, 0.1% NP-40, 1 mM DTT, 10 units of DNase I, with 0.1 mg/mL CHX). The

699 cells were then triturated by repeated pipetting and incubated with lysis buffer for at least  
700 20 min to ensure virus inactivation. Lysates were centrifuged for 10 min at  $\geq 20,000$  g at  
701 4°C for clarification. The supernatants were split into multiple aliquots, with SDS added to  
702 one aliquot to a final concentration of 1% for downstream RNA-seq sample preparation,  
703 and flash frozen in a 70% ethanol/dry ice bath or directly placed at -80°C. Lysates were  
704 treated with RNase I (5U/OD<sub>260</sub>) and ribosome-protected fragments were isolated via  
705 centrifugation through Microspin S-400 HR columns (GE Healthcare) and purified using  
706 the RNA Clean and Concentrator kit (Zymo Research). Recovered ribosome-bound  
707 fragments (RBFs) are then subjected to rRNA depletion using RiboZero beads from the  
708 TruSeq Stranded Total RNA Library Prep Gold kit (Illumina) and purified using Zymo RNA  
709 Clean and Concentrator kit. Fragments were then end-labeled with  $\gamma$ -<sup>32</sup>P-ATP using T4  
710 polynucleotide kinase (NEB), separated on 15% TBE-Urea gels and visualized by  
711 autoradiography. RNA fragments of ~30 nt were excised from the gels and purified as  
712 detailed before in 400  $\mu$ L of 0.4 M NaCl supplemented with 4  $\mu$ L SUPERaseIN. 3' and 5'  
713 adapters were sequentially ligated as in a previously described protocol (Kutluay et al.,  
714 2014, Kutluay and Bieniasz, 2016), reverse transcribed and PCR amplified. Libraries were  
715 then sequenced on HiSeq-2000 or NextSeq 500 platforms (Illumina) at the Genome  
716 Technology Access Center or the Edison Family Center for Genome Sciences & Systems  
717 Biology, respectively, at Washington University School of Medicine. All ribo-seq and RNA-  
718 seq data were deposited on GEO database under GSE158930.

719

720 **RNA-seq.** An aliquot of cell lysates harvested from ribosome profiling (Ribo-seq)  
721 experiments above was processed in parallel for RNA-seq using TruSeq Stranded mRNA  
722 library prep (Illumina) following extraction using Zymo RNA-Clean and Concentrator (5)  
723 kit. RNA-seq libraries were constructed using TruSeq RNA single-index adapters and  
724 deep sequenced as above at Washington University in St. Louis.

725

726 **Data analysis.** All of the data analysis pipelines used in this study are deposited to GitHub  
727 under kutluaylab. Below we detail the salient steps of data analyses:

728

729 **Mapping.** Generated RNA-seq and Ribo-seq data were analyzed by publicly available  
730 software and custom scripts. In brief, for Ribo-seq, reads were separated based on  
731 barcodes and the adapters trimmed using BBDuk ([http://jgi.doe.gov/data-and-](http://jgi.doe.gov/data-and-tools/bb-tools/)  
732 [tools/bb-tools/](http://jgi.doe.gov/data-and-tools/bb-tools/)) and FastX Toolkit ([http://hannonlab.cshl.edu/fastx\\_toolkit/](http://hannonlab.cshl.edu/fastx_toolkit/)). The  
733 resulting reads were mapped to the viral genome/transcriptome using the Bowtie aligner  
734 (Langmead et al., 2009) (mapping criteria -v 1, -m 10), and to the African green monkey  
735 (AGM) genome (*Chlorocebus sabaeus*) in STAR (Dobin et al., 2013) (mapping criteria  
736 FilterMismatchNoverLmax 0.04). For AGM alignments, reads were first mapped to rRNA  
737 to remove any rRNA-derived reads not completely removed by depletion kits and to the  
738 SARS-CoV-2 genome to remove virally derived reads. The remaining reads were then  
739 mapped to the AGM genome. RNA-seq reads were similarly mapped to the viral and AGM  
740 genomes using STAR, although the rRNA alignment step was omitted. For AGM  
741 alignments, mapped reads were annotated using the featureCounts package and GTF  
742 files freely available from NCBI and Ensembl.

743

744 **Statistical Analysis:** Differential gene expression analysis was carried out using the  
745 featureCounts output files via the edgeR package (Robinson et al., 2010), available from  
746 Bioconductor. Considering that virally derived sequences quickly dominated the host  
747 mRNA pool, for differential gene expression of host mRNAs, library sizes were normalized  
748 relative to reads that map only to host mRNAs. Efforts in this area focused on determining  
749 upregulated genes using individual Ribo-seq and RNA-seq experiments, as well as the

750 analysis of  $\log_2$ -fold change differences between Ribo-seq and RNA-seq to discover  
751 translationally regulated genes. These same files and packages were also used to  
752 generate quality control plots and graphics highlighting differentially expressed genes.  
753 The calculation of translational efficiency involved normalizing counts to account for library  
754 size in edgeR to generate  $\log_2$  counts-per-million ( $\log_2$ CPM) estimates for each gene in  
755 Ribo-seq and RNA-seq, and subtracting  $\log_2$ CPM RNA-seq from  $\log_2$ CPM Ribo-seq to  
756 provide an estimate of the difference in expression level between Ribo-seq and RNA-seq  
757 for a given gene.

758

759 Additionally, the R package TcGSA was used to determine individual host genes and gene  
760 sets differentially regulated over time (Hejblum et al., 2015). The normalized gene counts  
761 at each time-point were provided as input, along with the 'hallmark' Gene Matrix file  
762 containing annotated sets of processes and associated genes, downloaded from GSEA  
763 (Subramanian et al., 2005, Mootha et al., 2003). As output, TcGSA provides clusters of  
764 genes within each gene set, which follow particular trends. From these clusters, individual  
765 genes differentially regulated over time were extracted and plotted as heatmaps in R.

766

767 Downstream analysis of sets of differential genes involved the use of goseq (Young et al.,  
768 2010) and KEGGREST R packages (Tenenbaum, 2020). Annotations of 5'UTRs, CDSs  
769 and 3'UTRs were retrieved and repetitive low-complexity elements were removed. The R  
770 package riboWaltz (Lauria et al., 2018) was utilized to determine the location of ribosomal  
771 P-sites with respect to the 5' and 3' end of reads, as well as illustrating triplet periodicity  
772 and determining the percentage of reads within each frame in CDS and UTR . Finally, the  
773 metagene R package (Beauparlant, 2020) was applied to generate an aggregate analysis  
774 of ribosomal density downstream of start codons and upstream of stop codons in the  
775 corresponding genome.

776

777 Alternative TIS sites in both host and viral reads were found using the Ribo-TISH package  
778 (Zhang et al., 2017). For viral TIS, analysis was carried out in the 'predict' mode comparing  
779 samples mock-treated or treated with harringtonine at each timepoint (with replicates).  
780 This was replicated for host analysis, although with the additional step of analysis in the  
781 'diff' mode to predict TIS differentially regulated between infected and uninfected cells.

782

783 **Viral Counts:** Viral read density plots were generated using the SAM file from viral  
784 genome alignment. The SAMtools (Li et al., 2009) package was used to create an mpileup  
785 file containing information about the read density, strandedness, mapping quality, and  
786 nucleotide identity at each position. Custom scripts (deposited at GitHub under  
787 kutluaylab) then were utilized to create files providing only the nucleotide identity and  
788 number of counts at each position for both sense and antisense reads. These were then  
789 visualized by scripts written in R.

790

791 As SARS-CoV-2 generates chimeric subgenomic mRNAs (sgRNAs) in addition to its  
792 genomic RNA (gRNA), featureCounts could not be used to accurately estimate viral gene  
793 counts from RNASeq due to the presence of nested 3' sequences. Therefore, in order to  
794 visualize and enumerate such chimeric sequences the BWA aligner (Li and Durbin, 2009)  
795 was used in 'mem' mode on viral RNASeq reads. After generating this alignment using  
796 the default parameters and same reference SARS-CoV-2 FASTA file as above, chimeric  
797 reads were isolated by searching for all reads containing the 'SA' tag and the SARS TRS  
798 sequence, 'AAACGAAC'. SARS-CoV-2 gRNAs were extracted by searching for all reads  
799 containing the first 15-20 bases of the ORF1A coding sequence (CDS), as these  
800 sequences would only be present in full-length SARS-CoV-2 genomes. This provided the  
801 sequences and alignment locations of the chimeric and genomic reads, which were then

802 visualized using R. For sgRNAs, the viral gene corresponding to each transcript was  
803 determined by locating the CDS with the nearest downstream start site. This data,  
804 together with the number of gRNAs was used to calculate relative percentages of viral  
805 transcripts and, together with the total number of mapped viral reads, allowed for the  
806 tabulation of viral gene counts at each time point. For ribosome profiling data,  
807 featureCounts was used to enumerate the number of viral reads, as ribosomes only  
808 translate the first gene on each transcript and so footprints from nested 3' gene were low  
809 enough to be negligible.

810

#### 811 **SUPPLEMENTARY FIGURE LEGENDS**

812 **Figure S1. SARS-CoV-2 infection of Vero E6 cells (Supplemental to Figure 1 and**  
813 **Figure 2).** Vero cells were infected at an MOI of 0.1 pfu/cell (A) or 2 pfu/cell (B). Infected  
814 cells were fixed at the indicated time points post-infection and stained using an antibody  
815 against the viral N protein and visualized by microscopy.\

816

817 **Figure S2. Quality control of Ribo-seq libraries derived from Vero E6 cells infected**  
818 **with SARS-CoV-2 at a low MOI (Supplemental to Figure 1).** Vero E6 cells infected as  
819 in Fig. 1A at an MOI of 0.1 pfu/cell were processed for ribo-seq as detailed in Materials  
820 and Methods. (A) Length distribution of ribo-seq-derived reads mapping to the African  
821 green monkey (AGM) transcriptome are shown from independent replicates. (B) Length  
822 distribution of ribo-seq-derived reads mapping to SARS-CoV-2 genome. (C) Number of  
823 reads mapping to 5'UTR, CDS and 3' UTRs of annotated AGM genes in matching RNA-  
824 seq and ribo-seq libraries are shown. (D) Meta-profiles showing the periodicity of  
825 ribosomes along the AGM transcripts at the genome-wide scale from independent  
826 replicate samples. (E, F) Length distribution of ribo-seq-derived reads mapping to anti-  
827 sense SARS-CoV-2 transcripts (E) or SARS-CoV-2 ORF1ab region (F).



828

829 **Figure S3. Length distribution of ribo-seq reads derived from Vero E6 cells infected**  
830 **with SARS-CoV-2 at a high MOI (Supplemental to Figure 2).** Vero E6 cells infected  
831 with SARS-CoV-2 as in Fig. 1A at an MOI of 2 pfu/cell were processed for ribo-seq as  
832 detailed in Materials and Methods. (A) Length distribution of ribo-seq-derived reads  
833 mapping to the African green monkey (AGM) transcriptome are shown from independent  
834 replicates. (B, C) Length distribution of ribo-seq-derived reads mapping to SARS-CoV-2  
835 genome (B) or anti-sense SARS-CoV-2 transcripts (C) from independent experiments are  
836 shown.

837

838 **Figure S4. Ribo-seq-derived reads map to 5'UTRs and CDSs but are depleted of**  
839 **3'UTRs (Supplemental to Figure 2).** Vero E6 cells infected with SARS-CoV-2 as in Fig.  
840 1A at an MOI of 2 pfu/cell were processed for ribo-seq and RNA-seq as detailed in  
841 Materials and Methods. Reads mapping to 5'UTRs, CDSs and 3'UTRs of the AGM  
842 transcriptome are depicted for the indicated samples.

843

844 **Figure S5. Metaprofiles and P-site analyses of ribo-seq reads derived from Vero E6**  
845 **cells infected at a MOI of 2 pfu/cell (Supplemental to Figure 2).** Meta-profiles showing  
846 the periodicity of ribosomes along the AGM transcripts at the genome-wide scale from  
847 independent ribo-seq libraries.

848

849 **Figure S6. RNA-seq on sense and antisense SARS-CoV-2 transcripts during low**  
850 **MOI infection (Supplemental to Figure 1).** Data derived from experiments described in  
851 Figure 1 and a replicate experiment were plotted to demonstrate the number of reads that  
852 map to sense vs. antisense transcripts at 24 (A) and 48 (B) hpi. Schematic diagram of  
853 SARS-CoV-2 genome features shown below is co-linear.

854

855 **Figure S7. Ribosome occupancy on the SARS-CoV-2 genome during low MOI**  
856 **infection (Supplemental to Figure 1).** Vero E6 cells were infected at 0.1 pfu/cell and  
857 cells were processed for RNA-seq and Ribo-seq as in Figure 1. Ribo-seq and RNA-seq  
858 reads (counts) mapping to the first 20000 nucleotides (ORF1ab) of the viral genome at 24  
859 (A) and 48 (B) hpi with constituent non-structural proteins (NSPs) shown below is co-  
860 linear.

861

862 **Figure S8. Ribosome occupancy on sense and antisense SARS-CoV-2 transcripts**  
863 **during low MOI infection (Supplemental to Figure 1).** Ribo-seq data derived from the  
864 two independent experiments described in Figure 1 were plotted to demonstrate the  
865 number of reads mapping to sense and antisense transcripts at 24 (A, C) and 48 (B, D)  
866 hpi. Schematic diagram of SARS2 genome features shown below is co-linear.

867

868 **Figure S9. RNA-seq on sense and antisense SARS-CoV-2 transcripts during high**  
869 **MOI infection (Supplemental to Figure 2).** RNA-seq data derived from experiments  
870 described in Figure 1 were plotted to demonstrate the number of reads that map to  
871 sense and. antisense transcripts at 2 hpi (A), 6 hpi (B), 12 hpi (C), 24 hpi (D) and 48 hpi  
872 (E). Schematic diagram of SARS2 genome features shown below is co-linear.

873

874 **Figure S10. Reproducibility of RNA-seq experiments (Supplemental to Figure 2).**  
875 RNA-seq data derived from a replicate experiment described in Figure 1 were plotted to  
876 demonstrate the number of reads that map to sense vs. antisense transcripts at 2 hpi (A),  
877 6 hpi (B), 12 hpi (C), 24 hpi (D) and 48 hpi (E). Schematic diagram of SARS2 genome  
878 features shown below is co-linear.

879

880 **Figure S11. Ribosome occupancy on sense and antisense SARS-CoV-2 transcripts**  
881 **during high MOI infection (Supplemental to Figure 2).** Ribo-seq data derived from  
882 experiments described in Figure 1 were plotted to demonstrate the number of reads that  
883 map to sense vs. antisense transcripts at 2 hpi (A), 6 hpi (B), 12 hpi (C), 24 hpi (D) and 48  
884 hpi (E). Schematic diagram of SARS2 genome features shown below is co-linear.

885

886 **Figure S12. Reproducibility of Ribo-seq experiments (Supplemental to Figure 2).**  
887 Ribo-seq data derived from a replicate experiment described in Figure 1 were plotted to  
888 demonstrate the number of reads that map to sense vs. antisense transcripts at 2 hpi (A),  
889 6 hpi (B), 12 hpi (C), 24 hpi (D) and 48 hpi (E). Schematic diagram of SARS2 genome  
890 features shown below is co-linear.

891

892 **Figure S13. Properties of the high ribosome occupancy site located between 27371-**  
893 **27457 nt (supplemental to Figure 2).** (A) Sequence homology of the high ribosome  
894 occupancy site between SARS-CoV-2 27371-27457nts and SARS-CoV (27243-27336).  
895 (B) Predicted secondary structure of the SARS-CoV-2 sequence at 27371-27457nts using  
896 RNAstructure. (C) Ribosome occupancy surrounding nucleotides 27371-27457 at the  
897 indicated time points post-infection.

898

899 **Figure S14. Ribosome occupancy remains low within the SARS-CoV-2 frameshifting**  
900 **site throughout infection (supplemental to Figure 2).** (A-E) Ribosome occupancy  
901 surrounding and within the frameshifting site at the indicated time points post-infection  
902 (derived from Ribo-seq experiments in Figure 2) is shown. Red bars indicate the position  
903 of the frameshifting element. (F) Length distribution of ribo-seq-derived reads mapping to  
904 SARS-CoV-2 ORF1ab. (G) ORF1aframeshifting efficiency of SARS-CoV-2 throughout the  
905 course of infection.

906

907 **Figure S15. Quality control of Ribo-seq libraries derived from primary CD4+ T-cells**

908 **infected with HIV-1 (Supplemental to Figure 2).** CD4+ T-cells isolated from two

909 independent donors infected HIV-1 were processed for ribo-seq as detailed in Materials

910 and Methods. Length distribution of ribo-seq-derived reads mapping to the human

911 transcriptome (A) and HIV-1 genome (B) are shown for independent replicates. (C) Meta-

912 profiles showing the periodicity of ribosomes along the human transcripts at the genome-

913 wide scale from independent replicate samples. (D) Number of reads mapping to 5'UTR,

914 CDS and 3' UTRs of annotated human genes in matching RNA-seq and ribo-seq libraries

915 are shown.

916

917 **Figure S16. Ribo-seq in HIV-1-infected cells reveals structural elements that**

918 **regulate translation (supplemental to Figure 2).** Primary CD4+ T-cells were infected

919 with HIV-1<sub>NL4-3</sub>/VSV-G at an MOI of 2 and infected cells processed for RNA-seq and Ribo-

920 seq at 24 hpi. (A) Ribo-seq and RNA-seq reads (counts) mapping to the HIV-1 genome is

921 shown. Schematic diagram of HIV-1 genome features shown below is co-linear. (B)

922 Secondary structure prediction of the HIV-1 ribosome frameshifting element is shown. (C)

923 Ribosome occupancy within the frameshifting site is shown.

924

925 **Figure S17. SARS-CoV-2 infection of primary HBECs grown at ALI (supplemental to**

926 **Figure 3).** (A) Primary HBEC cultures were infected with SARS-CoV-2 at an MOI of 0.5

927 pfu/cell and fixed at 72 hpi. Cells were probed with anti-spike (anti-S) and anti-

928 nucleoprotein (anti-N) antibodies and imaged by microscopy. (B, C) Primary HBEC

929 cultures were infected with SARS-CoV-2 at an MOI of 1 pfu/cell and fixed at 96 hpi. Cells

930 were probed with RNAScope probes against sense- and anti-sense SARS-CoV-2

931 transcripts, and imaged by microscopy with a 4X (B) or 20X objective (C). (D) Primary

932 HBEC cultures were infected with SARS-CoV-2-NeonGreen and imaged live during the  
933 course of infection at the indicated time points.

934

935 **Figure S18. Quality of ribo-seq experiments from SARS-CoV-2-infected primary**  
936 **HBECs grown at ALI (supplemental to Figure 3).** Primary HBEC cultures were infected  
937 with SARS-CoV-2 at an MOI of 0.5 or MOI of 1 pfu/cell as in Figure 3 and processed for  
938 ribo-seq at the indicated times post-infection. (A, B) Length distribution of ribo-seq-derived  
939 reads mapping to the human transcriptome (A) and SARS-CoV-2 genome (B) are shown.  
940 (C) Number of reads mapping to 5'UTR, CDS and 3' UTRs of annotated human genes in  
941 matching RNA-seq and ribo-seq libraries are shown.

942 **Figure S19. Metaprofiles and P-site analyses of ribo-seq reads derived from SARS-**  
943 **CoV-2-infected primary HBEC cells (Supplemental to Figure 3).** Meta-profiles  
944 showing the periodicity of ribosomes along the human transcripts at the genome-wide  
945 scale from independent ribo-seq libraries derived from primary HBECs infected at the  
946 indicated MOIs and times post-infection.

947

948 **Figure S20. Reproducibility of RNA-seq and ribo-seq data sets (supplemental to**  
949 **Figure 4).** (A) Correlation of  $\log_2$ (counts per million mapped reads) for each gene  
950 derived from RNA-seq experiments is shown. (B) Correlation of  $\log_2$  counts per million  
951 mapped reads for each gene derived from ribo-seq experiments is shown.

952

953 **Figure S21. Time-course analysis of differentially expressed genes in response to**  
954 **SARS-CoV-2 infection (Supplemental to Figure 4).** Differentially expressed genes  
955 across different time points from Figure 4 were plotted to demonstrate the time-course  
956 progression of differential gene expression in RNA-seq and ribo-seq data sets. Data

957 show the  $\log_2$ (fold-change) values of genes that are up- or down-regulated greater than  
958 2-fold with  $FDR < 0.05$ .

959

960 **Figure S22. Time-course analysis of differentially expressed genes in response to**  
961 **SARS-CoV-2 infection (Supplemental to Figure 4).**  $\log_2$ (cpm) values of differentially  
962 expressed genes from Figure 4 are plotted for each experiment.

963

964 **Figure S23. SARS-CoV-2 infection induces a general decrease in host mRNA**  
965 **expression (high MOI, supplemental to Figure 4).** Vero E6 cells were infected at 2  
966 pfu/cell and cells were processed for RNA-seq. Volcano plots show the  $\log_2$  fold-change  
967 (x-axis) vs. significance ( $-\log(P\text{value})$ , y-axis) of host genes at 2 hpi (A), 6 hpi (B), 12 hpi  
968 (C), 24 hpi (D) and 48 hpi (E). Top differentially expressed genes ( $FDR < 0.05$ , fold  
969 change  $> 2$ ) are indicated by blue dots.

970

971 **Figure S24. SARS-CoV-2 infection results in lower translation rates for mRNAs**  
972 **coding for immune responses (supplemental to Figure 4).** Expression levels (fold  
973 change over mock) of select immune-related mRNAs that were significantly upregulated  
974 in RNA-seq data set were compared to expression levels derived from ribo-seq data set.

975

976 **Figure S25. Differentially transcribed and translated host genes in SARS-CoV-2-**  
977 **infected cells (supplemental to Figure 4).** Vero E6 cells were infected at 2 pfu/cell and  
978 processed for RNA-seq at 2 hpi and Ribo-seq at 24 hpi (A, C) and 48 hpi (B, D).

979 Heatmaps show the  $\log_2$  counts per million mapped reads (cpm) of the top differentially  
980 expressed genes ( $FDR < 0.05$ , fold change  $> 2$ ) derived from two independent  
981 experiments. Scale of each graph is shown below.

982

983 **Figure S26. Reproducibility of RNA-seq and ribo-seq data sets (supplemental to**  
984 **Figure 7). (A)** Correlation of  $\log_2$ (counts per million mapped reads) for each gene  
985 derived from RNA-seq experiments (low MOI) is shown. **(B)** Correlation of  $\log_2$  counts  
986 per million mapped reads for each gene derived from ribo-seq experiments (low MOI) is  
987 shown.

988

989 **Figure S27. Transcriptional responses of HBECs to SARS-CoV-2.** HBECs grown at  
990 ALI were infected with SARS-CoV-2 at a MOI of 0.5 i.u./cell and processed for RNA-seq  
991 (A) and ribo-seq (B) at 6, 24 and 48 hpi. Data were analyzed for trends in gene set  
992 enrichment over the period of infection.

993

#### 994 REFERENCES

- 995 BARIL, M., DULUDE, D., GENDRON, K., LEMAY, G. & BRAKIER-GINGRAS, L. 2003.  
996 Efficiency of a programmed -1 ribosomal frameshift in the different subtypes  
997 of the human immunodeficiency virus type 1 group M. *RNA*, 9, 1246-53.
- 998 BEAUPARLANT, C. J., LAMAZE, F.C., SAMB, R., LIPPENS, C., DESCHENES, A.L., DROIT,  
999 A. 2020. metagene: A package to produce metagene plots. R package version  
1000 2.20.0. .
- 1001 BETTUM, I. J., VASILIAUSKAITE, K., NYGAARD, V., CLANCY, T., PETTERSEN, S. J.,  
1002 TENSTAD, E., MAELANDSMO, G. M. & PRASMICKAITE, L. 2014. Metastasis-  
1003 associated protein S100A4 induces a network of inflammatory cytokines that  
1004 activate stromal cells to acquire pro-tumorigenic properties. *Cancer Lett*, 344,  
1005 28-39.
- 1006 BHARADWAJ, A., BYDOUN, M., HOLLOWAY, R. & WAISMAN, D. 2013. Annexin A2  
1007 heterotetramer: structure and function. *Int J Mol Sci*, 14, 6259-305.
- 1008 BIDOU, L., STAHL, G., GRIMA, B., LIU, H., CASSAN, M. & ROUSSET, J. P. 1997. In vivo  
1009 HIV-1 frameshifting efficiency is directly related to the stability of the stem-  
1010 loop stimulatory signal. *RNA*, 3, 1153-8.
- 1011 BISWAS, P., JIANG, X., PACCHIA, A. L., DOUGHERTY, J. P. & PELTZ, S. W. 2004. The  
1012 human immunodeficiency virus type 1 ribosomal frameshifting site is an  
1013 invariant sequence determinant and an important target for antiviral therapy.  
1014 *J Virol*, 78, 2082-7.
- 1015 BLANCO-MELO, D., NILSSON-PAYANT, B. E., LIU, W. C., UHL, S., HOAGLAND, D.,  
1016 MOLLER, R., JORDAN, T. X., OISHI, K., PANIS, M., SACHS, D., WANG, T. T.,  
1017 SCHWARTZ, R. E., LIM, J. K., ALBRECHT, R. A. & TENOEVER, B. R. 2020.

- 1018 Imbalanced Host Response to SARS-CoV-2 Drives Development of COVID-19.  
1019 *Cell*, 181, 1036-1045 e9.
- 1020 BRIERLEY, I. & DOS RAMOS, F. J. 2006. Programmed ribosomal frameshifting in HIV-  
1021 1 and the SARS-CoV. *Virus Res*, 119, 29-42.
- 1022 BUTLER, D. J., MOZSARY, C., MEYDAN, C., DANKO, D., FOOX, J., ROSIENE, J., SHAIKER,  
1023 A., AFSHINNEKOO, E., MACKAY, M., SEDLAZECK, F. J., IVANOV, N. A., SIERRA,  
1024 M., POHLE, D., ZIETZ, M., GISLADOTTIR, U., RAMLALL, V., WESTOVER, C. D.,  
1025 RYON, K., YOUNG, B., BHATTACHARYA, C., RUGGIERO, P., LANGHORST, B. W.,  
1026 TANNER, N., GAWRYS, J., MELESHKO, D., XU, D., STEEL, P. A. D., SHEMESH, A.  
1027 J., XIANG, J., THIERRY-MIEG, J., THIERRY-MIEG, D., SCHWARTZ, R. E., IFTNER,  
1028 A., BEZDAN, D., SIPLEY, J., CONG, L., CRANEY, A., VELU, P., MELNICK, A. M.,  
1029 HAJIRASOULIHA, I., HORNER, S. M., IFTNER, T., SALVATORE, M., LODA, M.,  
1030 WESTBLADE, L. F., CUSHING, M., LEVY, S., WU, S., TATONETTI, N., IMIELINSKI,  
1031 M., RENNERT, H. & MASON, C. E. 2020. Shotgun Transcriptome and Isothermal  
1032 Profiling of SARS-CoV-2 Infection Reveals Unique Host Responses, Viral  
1033 Diversification, and Drug Interactions. *bioRxiv*.
- 1034 CHANG, S. Y., SUTTHENT, R., AUEWARAKUL, P., APICHARTPIYAKUL, C., ESSEX, M. &  
1035 LEE, T. H. 1999. Differential stability of the mRNA secondary structures in the  
1036 frameshift site of various HIV type 1 viruses. *AIDS Res Hum Retroviruses*, 15,  
1037 1591-6.
- 1038 CHANNAPPANAVAR, R. & PERLMAN, S. 2017. Pathogenic human coronavirus  
1039 infections: causes and consequences of cytokine storm and immunopathology.  
1040 *Semin Immunopathol*, 39, 529-539.
- 1041 CHEN, G., CHANG, K. Y., CHOU, M. Y., BUSTAMANTE, C. & TINOCO, I., JR. 2009. Triplex  
1042 structures in an RNA pseudoknot enhance mechanical stability and increase  
1043 efficiency of -1 ribosomal frameshifting. *Proc Natl Acad Sci U S A*, 106, 12706-  
1044 11.
- 1045 DAFFIS, S., SZRETTTER, K. J., SCHRIEWER, J., LI, J., YOUN, S., ERRETT, J., LIN, T. Y.,  
1046 SCHNELLER, S., ZUST, R., DONG, H., THIEL, V., SEN, G. C., FENSTERL, V.,  
1047 KLIMSTRA, W. B., PIERSON, T. C., BULLER, R. M., GALE, M., JR., SHI, P. Y. &  
1048 DIAMOND, M. S. 2010. 2'-O methylation of the viral mRNA cap evades host  
1049 restriction by IFIT family members. *Nature*, 468, 452-6.
- 1050 DE WIT, E., VAN DOREMALEN, N., FALZARANO, D. & MUNSTER, V. J. 2016. SARS and  
1051 MERS: recent insights into emerging coronaviruses. *Nat Rev Microbiol*, 14,  
1052 523-34.
- 1053 DIAMOND, M. S. & FARZAN, M. 2013. The broad-spectrum antiviral functions of IFIT  
1054 and IFITM proteins. *Nat Rev Immunol*, 13, 46-57.
- 1055 DINAN, A. M., KEEP, S., BICKERTON, E., BRITTON, P., FIRTH, A. E. & BRIERLEY, I. 2019.  
1056 Comparative Analysis of Gene Expression in Virulent and Attenuated Strains  
1057 of Infectious Bronchitis Virus at Subcodon Resolution. *J Virol*, 93.
- 1058 DINMAN, J. D. 2012. Mechanisms and implications of programmed translational  
1059 frameshifting. *Wiley Interdiscip Rev RNA*, 3, 661-73.
- 1060 DOBIN, A., DAVIS, C. A., SCHLESINGER, F., DRENKOW, J., ZALESKI, C., JHA, S., BATUT,  
1061 P., CHAISSON, M. & GINGERAS, T. R. 2013. STAR: ultrafast universal RNA-seq  
1062 aligner. *Bioinformatics*, 29, 15-21.



- 1063 DULUDE, D., BERCHICHE, Y. A., GENDRON, K., BRAKIER-GINGRAS, L. & HEVEKER, N.  
1064 2006. Decreasing the frameshift efficiency translates into an equivalent  
1065 reduction of the replication of the human immunodeficiency virus type 1.  
1066 *Virology*, 345, 127-36.
- 1067 FARABAUGH, P. J. 1996. Programmed translational frameshifting. *Microbiol Rev*, 60,  
1068 103-34.
- 1069 FENSTERL, V. & SEN, G. C. 2015. Interferon-induced Ifit proteins: their role in viral  
1070 pathogenesis. *J Virol*, 89, 2462-8.
- 1071 FINKEL, Y., MIZRAHI, O., NACHSHON, A., WEINGARTEN-GABBAY, S., MORGENSTERN,  
1072 D., YAHALOM-RONEN, Y., TAMIR, H., ACHDOUT, H., STEIN, D., ISRAELI, O.,  
1073 BETH-DIN, A., MELAMED, S., WEISS, S., ISRAELY, T., PARAN, N., SCHWARTZ, M.  
1074 & STERN-GINOSSAR, N. 2020. The coding capacity of SARS-CoV-2. *Nature*.
- 1075 GARCIA-MIRANDA, P., BECKER, J. T., BENNER, B. E., BLUME, A., SHERER, N. M. &  
1076 BUTCHER, S. E. 2016. Stability of HIV Frameshift Site RNA Correlates with  
1077 Frameshift Efficiency and Decreased Virus Infectivity. *J Virol*, 90, 6906-6917.
- 1078 GIEDROC, D. P. & CORNISH, P. V. 2009. Frameshifting RNA pseudoknots: structure  
1079 and mechanism. *Virus Res*, 139, 193-208.
- 1080 HANSEN, T. M., REIHANI, S. N., ODDERSHEDE, L. B. & SORENSEN, M. A. 2007.  
1081 Correlation between mechanical strength of messenger RNA pseudoknots and  
1082 ribosomal frameshifting. *Proc Natl Acad Sci U S A*, 104, 5830-5.
- 1083 HEJBLUM, B. P., SKINNER, J. & THIEBAUT, R. 2015. Time-Course Gene Set Analysis for  
1084 Longitudinal Gene Expression Data. *PLoS Comput Biol*, 11, e1004310.
- 1085 HORANI, A., DRULEY, T. E., ZARIWALA, M. A., PATEL, A. C., LEVINSON, B. T., VAN  
1086 ARENDONK, L. G., THORNTON, K. C., GIACALONE, J. C., ALBEE, A. J., WILSON, K.  
1087 S., TURNER, E. H., NICKERSON, D. A., SHENDURE, J., BAYLY, P. V., LEIGH, M. W.,  
1088 KNOWLES, M. R., BRODY, S. L., DUTCHER, S. K. & FERKOL, T. W. 2012. Whole-  
1089 exome capture and sequencing identifies HEATR2 mutation as a cause of  
1090 primary ciliary dyskinesia. *Am J Hum Genet*, 91, 685-93.
- 1091 HORANI, A., USTIONE, A., HUANG, T., FIRTH, A. L., PAN, J., GUNSTEN, S. P., HASPEL, J.  
1092 A., PISTON, D. W. & BRODY, S. L. 2018. Establishment of the early cilia  
1093 preassembly protein complex during motile ciliogenesis. *Proc Natl Acad Sci U*  
1094 *SA*, 115, E1221-E1228.
- 1095 HUANG, C., LOKUGAMAGE, K. G., ROZOVICS, J. M., NARAYANAN, K., SEMLER, B. L. &  
1096 MAKINO, S. 2011. SARS coronavirus nsp1 protein induces template-  
1097 dependent endonucleolytic cleavage of mRNAs: viral mRNAs are resistant to  
1098 nsp1-induced RNA cleavage. *PLoS Pathog*, 7, e1002433.
- 1099 HUANG, J., HUME, A. J., ABO, K. M., WERDER, R. B., VILLACORTA-MARTIN, C.,  
1100 ALYSANDRATOS, K. D., BEERMANN, M. L., SIMONE-ROACH, C., OLEJNIK, J.,  
1101 SUDER, E. L., BULLITT, E., HINDS, A., SHARMA, A., BOSMANN, M., WANG, R.,  
1102 HAWKINS, F., BURKS, E. J., SAEED, M., WILSON, A. A., MUHLBERGER, E. &  
1103 KOTTON, D. N. 2020. SARS-CoV-2 Infection of Pluripotent Stem Cell-derived  
1104 Human Lung Alveolar Type 2 Cells Elicits a Rapid Epithelial-Intrinsic  
1105 Inflammatory Response. *bioRxiv*.
- 1106 HUANG, X., YANG, Y., WANG, G., CHENG, Q. & DU, Z. 2014. Highly conserved RNA  
1107 pseudoknots at the Gag-Pol junction of HIV-1 suggest a novel mechanism of -1  
1108 ribosomal frameshifting. *RNA*, 20, 587-93.

- 1109 HYDE, J. L. & DIAMOND, M. S. 2015. Innate immune restriction and antagonism of viral  
1110 RNA lacking 2-O methylation. *Virology*, 479-480, 66-74.
- 1111 INGOLIA, N. T., BRAR, G. A., ROUSKIN, S., MCGEACHY, A. M. & WEISSMAN, J. S. 2012.  
1112 The ribosome profiling strategy for monitoring translation in vivo by deep  
1113 sequencing of ribosome-protected mRNA fragments. *Nat Protoc*, 7, 1534-50.
- 1114 INGOLIA, N. T., GHAEMMAGHAMI, S., NEWMAN, J. R. & WEISSMAN, J. S. 2009.  
1115 Genome-wide analysis in vivo of translation with nucleotide resolution using  
1116 ribosome profiling. *Science*, 324, 218-23.
- 1117 IRIGOYEN, N., FIRTH, A. E., JONES, J. D., CHUNG, B. Y., SIDDELL, S. G. & BRIERLEY, I.  
1118 2016. High-Resolution Analysis of Coronavirus Gene Expression by RNA  
1119 Sequencing and Ribosome Profiling. *PLoS Pathog*, 12, e1005473.
- 1120 JACKS, T., POWER, M. D., MASIARZ, F. R., LUCIW, P. A., BARR, P. J. & VARMUS, H. E.  
1121 1988. Characterization of ribosomal frameshifting in HIV-1 gag-pol  
1122 expression. *Nature*, 331, 280-3.
- 1123 JAFARZADEH, A., CHAUHAN, P., SAHA, B., JAFARZADEH, S. & NEMATI, M. 2020.  
1124 Contribution of monocytes and macrophages to the local tissue inflammation  
1125 and cytokine storm in COVID-19: Lessons from SARS and MERS, and potential  
1126 therapeutic interventions. *Life Sci*, 118102.
- 1127 JAMES, C. C. & SMYTH, J. W. 2018. Alternative mechanisms of translation initiation:  
1128 An emerging dynamic regulator of the proteome in health and disease. *Life Sci*,  
1129 212, 138-144.
- 1130 KAMITANI, W., HUANG, C., NARAYANAN, K., LOKUGAMAGE, K. G. & MAKINO, S. 2009.  
1131 A two-pronged strategy to suppress host protein synthesis by SARS  
1132 coronavirus Nsp1 protein. *Nat Struct Mol Biol*, 16, 1134-40.
- 1133 KIM, D., LEE, J. Y., YANG, J. S., KIM, J. W., KIM, V. N. & CHANG, H. 2020. The Architecture  
1134 of SARS-CoV-2 Transcriptome. *Cell*, 181, 914-921 e10.
- 1135 KOPECKY-BROMBERG, S. A., MARTINEZ-SOBRIDO, L. & PALESE, P. 2006. 7a protein  
1136 of severe acute respiratory syndrome coronavirus inhibits cellular protein  
1137 synthesis and activates p38 mitogen-activated protein kinase. *J Virol*, 80, 785-  
1138 93.
- 1139 KORNIY, N., SAMATOVA, E., ANOKHINA, M. M., PESKE, F. & RODNINA, M. V. 2019.  
1140 Mechanisms and biomedical implications of -1 programmed ribosome  
1141 frameshifting on viral and bacterial mRNAs. *FEBS Lett*, 593, 1468-1482.
- 1142 KUTLUAY, S. B. & BIENIASZ, P. D. 2016. Analysis of HIV-1 Gag-RNA Interactions in  
1143 Cells and Virions by CLIP-seq. *Methods Mol Biol*, 1354, 119-31.
- 1144 KUTLUAY, S. B., ZANG, T., BLANCO-MELO, D., POWELL, C., JANNAIN, D., ERRANDO, M.  
1145 & BIENIASZ, P. D. 2014. Global changes in the RNA binding specificity of HIV-  
1146 1 gag regulate virion genesis. *Cell*, 159, 1096-1109.
- 1147 KWAN, T. & THOMPSON, S. R. 2019. Noncanonical Translation Initiation in  
1148 Eukaryotes. *Cold Spring Harb Perspect Biol*, 11.
- 1149 LANGMEAD, B., TRAPNELL, C., POP, M. & SALZBERG, S. L. 2009. Ultrafast and  
1150 memory-efficient alignment of short DNA sequences to the human genome.  
1151 *Genome Biol*, 10, R25.
- 1152 LAURIA, F., TEBALDI, T., BERNABO, P., GROEN, E. J. N., GILLINGWATER, T. H. & VIERO,  
1153 G. 2018. riboWaltz: Optimization of ribosome P-site positioning in ribosome  
1154 profiling data. *PLoS Comput Biol*, 14, e1006169.

- 1155 LI, H. & DURBIN, R. 2009. Fast and accurate short read alignment with Burrows-  
1156 Wheeler transform. *Bioinformatics*, 25, 1754-60.
- 1157 LI, H., HANDSAKER, B., WYSOKER, A., FENNELLS, T., RUAN, J., HOMER, N., MARTH, G.,  
1158 ABECASIS, G., DURBIN, R. & GENOME PROJECT DATA PROCESSING, S. 2009.  
1159 The Sequence Alignment/Map format and SAMtools. *Bioinformatics*, 25, 2078-  
1160 9.
- 1161 LI, M. M., MACDONALD, M. R. & RICE, C. M. 2015. To translate, or not to translate: viral  
1162 and host mRNA regulation by interferon-stimulated genes. *Trends Cell Biol*, 25,  
1163 320-9.
- 1164 LI, Z., LI, Y., LIU, S. & QIN, Z. 2020. Extracellular S100A4 as a key player in fibrotic  
1165 diseases. *J Cell Mol Med*, 24, 5973-5983.
- 1166 LIU, Y., MYRVANG, H. K. & DEKKER, L. V. 2015. Annexin A2 complexes with S100  
1167 proteins: structure, function and pharmacological manipulation. *Br J*  
1168 *Pharmacol*, 172, 1664-76.
- 1169 LOKUGAMAGE, K. G., NARAYANAN, K., HUANG, C. & MAKINO, S. 2012. Severe acute  
1170 respiratory syndrome coronavirus protein nsp1 is a novel eukaryotic  
1171 translation inhibitor that represses multiple steps of translation initiation. *J*  
1172 *Virology*, 86, 13598-608.
- 1173 MASTERS, P. S. 2006. The molecular biology of coronaviruses. *Adv Virus Res*, 66, 193-  
1174 292.
- 1175 MENACHERY, V. D., EISFELD, A. J., SCHAFFER, A., JOSSET, L., SIMS, A. C., PROLL, S., FAN,  
1176 S., LI, C., NEUMANN, G., TILTON, S. C., CHANG, J., GRALINSKI, L. E., LONG, C.,  
1177 GREEN, R., WILLIAMS, C. M., WEISS, J., MATZKE, M. M., WEBB-ROBERTSON, B.  
1178 J., SCHEPPOES, A. A., SHUKLA, A. K., METZ, T. O., SMITH, R. D., WATERS, K. M.,  
1179 KATZE, M. G., KAWAOKA, Y. & BARIC, R. S. 2014. Pathogenic influenza viruses  
1180 and coronaviruses utilize similar and contrasting approaches to control  
1181 interferon-stimulated gene responses. *mBio*, 5, e01174-14.
- 1182 MITCHELL, H. D., EISFELD, A. J., SIMS, A. C., MCDERMOTT, J. E., MATZKE, M. M., WEBB-  
1183 ROBERTSON, B. J., TILTON, S. C., TCHITCHEK, N., JOSSET, L., LI, C., ELLIS, A. L.,  
1184 CHANG, J. H., HEEGEL, R. A., LUNA, M. L., SCHEPPOES, A. A., SHUKLA, A. K.,  
1185 METZ, T. O., NEUMANN, G., BENECKE, A. G., SMITH, R. D., BARIC, R. S.,  
1186 KAWAOKA, Y., KATZE, M. G. & WATERS, K. M. 2013. A network integration  
1187 approach to predict conserved regulators related to pathogenicity of influenza  
1188 and SARS-CoV respiratory viruses. *PLoS One*, 8, e69374.
- 1189 MOOTHA, V. K., LINDGREN, C. M., ERIKSSON, K. F., SUBRAMANIAN, A., SIHAG, S.,  
1190 LEHAR, J., PUIGSERVER, P., CARLSSON, E., RIDDERSTRALE, M., LAURILA, E.,  
1191 HOUSTIS, N., DALY, M. J., PATTERSON, N., MESIROV, J. P., GOLUB, T. R.,  
1192 TAMAYO, P., SPIEGELMAN, B., LANDER, E. S., HIRSCHHORN, J. N., ALTSHULER,  
1193 D. & GROOP, L. C. 2003. PGC-1alpha-responsive genes involved in oxidative  
1194 phosphorylation are coordinately downregulated in human diabetes. *Nat*  
1195 *Genet*, 34, 267-73.
- 1196 MOUZAKIS, K. D., LANG, A. L., VANDER MEULEN, K. A., EASTERDAY, P. D. & BUTCHER,  
1197 S. E. 2013. HIV-1 frameshift efficiency is primarily determined by the stability  
1198 of base pairs positioned at the mRNA entrance channel of the ribosome.  
1199 *Nucleic Acids Res*, 41, 1901-13.

- 1200 NAKAGAWA, K., LOKUGAMAGE, K. G. & MAKINO, S. 2016. Viral and Cellular mRNA  
1201 Translation in Coronavirus-Infected Cells. *Adv Virus Res*, 96, 165-192.
- 1202 NARAYANAN, K., HUANG, C., LOKUGAMAGE, K., KAMITANI, W., IKEGAMI, T., TSENG,  
1203 C. T. & MAKINO, S. 2008. Severe acute respiratory syndrome coronavirus nsp1  
1204 suppresses host gene expression, including that of type I interferon, in infected  
1205 cells. *J Virol*, 82, 4471-9.
- 1206 NARAYANAN, K., RAMIREZ, S. I., LOKUGAMAGE, K. G. & MAKINO, S. 2015. Coronavirus  
1207 nonstructural protein 1: Common and distinct functions in the regulation of  
1208 host and viral gene expression. *Virus Res*, 202, 89-100.
- 1209 PARKIN, N. T., CHAMORRO, M. & VARMUS, H. E. 1992. Human immunodeficiency virus  
1210 type 1 gag-pol frameshifting is dependent on downstream mRNA secondary  
1211 structure: demonstration by expression in vivo. *J Virol*, 66, 5147-51.
- 1212 PERLMAN, S. & DANDEKAR, A. A. 2005. Immunopathogenesis of coronavirus  
1213 infections: implications for SARS. *Nat Rev Immunol*, 5, 917-27.
- 1214 PLANT, E. P. & DINMAN, J. D. 2008. The role of programmed-1 ribosomal  
1215 frameshifting in coronavirus propagation. *Front Biosci*, 13, 4873-81.
- 1216 PLANT, E. P., JACOBS, K. L., HARGER, J. W., MESKAUSKAS, A., JACOBS, J. L., BAXTER, J.  
1217 L., PETROV, A. N. & DINMAN, J. D. 2003. The 9-A solution: how mRNA  
1218 pseudoknots promote efficient programmed -1 ribosomal frameshifting. *RNA*,  
1219 9, 168-74.
- 1220 RAO, S., HOSKINS, I., GARCIA, P. D., TONN, T., OZADAM, H., CENIK, E. S. & CENIK, C.  
1221 2020. Genes with 5' terminal oligopyrimidine tracts preferentially escape  
1222 global suppression of translation by the SARS-CoV-2 NSP1 protein. *bioRxiv*.
- 1223 REYNAUD, J. M., KIM, D. Y., ATASHEVA, S., RASALOUSKAYA, A., WHITE, J. P.,  
1224 DIAMOND, M. S., WEAVER, S. C., FROLOVA, E. I. & FROLOV, I. 2015. IFIT1  
1225 Differentially Interferes with Translation and Replication of Alphavirus  
1226 Genomes and Promotes Induction of Type I Interferon. *PLoS Pathog*, 11,  
1227 e1004863.
- 1228 RIBA, A., DI NANNI, N., MITTAL, N., ARHNE, E., SCHMIDT, A. & ZAVOLAN, M. 2019.  
1229 Protein synthesis rates and ribosome occupancies reveal determinants of  
1230 translation elongation rates. *Proc Natl Acad Sci U S A*, 116, 15023-15032.
- 1231 ROBINSON, M. D., MCCARTHY, D. J. & SMYTH, G. K. 2010. edgeR: a Bioconductor  
1232 package for differential expression analysis of digital gene expression data.  
1233 *Bioinformatics*, 26, 139-40.
- 1234 SCHUBERT, K., KAROUSIS, E. D., JOMAA, A., SCAIOLA, A., ECHEVERRIA, B., GURZELER,  
1235 L. A., LEIBUNDGUT, M., THIEL, V., MUHLEMANN, O. & BAN, N. 2020. SARS-CoV-  
1236 2 Nsp1 binds the ribosomal mRNA channel to inhibit translation. *Nat Struct  
1237 Mol Biol*, 27, 959-966.
- 1238 SHEHU-XHILAGA, M., CROWE, S. M. & MAK, J. 2001. Maintenance of the Gag/Gag-Pol  
1239 ratio is important for human immunodeficiency virus type 1 RNA dimerization  
1240 and viral infectivity. *J Virol*, 75, 1834-41.
- 1241 STAPLE, D. W. & BUTCHER, S. E. 2005. Solution structure and thermodynamic  
1242 investigation of the HIV-1 frameshift inducing element. *J Mol Biol*, 349, 1011-  
1243 23.
- 1244 SUBRAMANIAN, A., TAMAYO, P., MOOTHA, V. K., MUKHERJEE, S., EBERT, B. L.,  
1245 GILLETTE, M. A., PAULOVICH, A., POMEROY, S. L., GOLUB, T. R., LANDER, E. S.

- 1246 & MESIROV, J. P. 2005. Gene set enrichment analysis: a knowledge-based  
1247 approach for interpreting genome-wide expression profiles. *Proc Natl Acad Sci*  
1248 *USA*, 102, 15545-50.
- 1249 TAYLOR, J. R., SKEATE, J. G. & KAST, W. M. 2018. Annexin A2 in Virus Infection. *Front*  
1250 *Microbiol*, 9, 2954.
- 1251 TENENBAUM, D. 2020. KEGGREST: Client-side REST access to KEGG. R package  
1252 version 1.6.4.
- 1253 WANG, X., XUAN, Y., HAN, Y., DING, X., YE, K., YANG, F., GAO, P., GOFF, S. P. & GAO, G.  
1254 2019. Regulation of HIV-1 Gag-Pol Expression by Shiftless, an Inhibitor of  
1255 Programmed -1 Ribosomal Frameshifting. *Cell*, 176, 625-635 e14.
- 1256 WEISS, S. R. & NAVAS-MARTIN, S. 2005. Coronavirus pathogenesis and the emerging  
1257 pathogen severe acute respiratory syndrome coronavirus. *Microbiol Mol Biol*  
1258 *Rev*, 69, 635-64.
- 1259 WILK, A. J., RUSTAGI, A., ZHAO, N. Q., ROQUE, J., MARTINEZ-COLON, G. J., MCKECHNIE,  
1260 J. L., IVISON, G. T., RANGANATH, T., VERGARA, R., HOLLIS, T., SIMPSON, L. J.,  
1261 GRANT, P., SUBRAMANIAN, A., ROGERS, A. J. & BLISH, C. A. 2020. A single-cell  
1262 atlas of the peripheral immune response in patients with severe COVID-19.  
1263 *Nat Med*, 26, 1070-1076.
- 1264 WILSON, W., BRADDOCK, M., ADAMS, S. E., RATHJEN, P. D., KINGSMAN, S. M. &  
1265 KINGSMAN, A. J. 1988. HIV expression strategies: ribosomal frameshifting is  
1266 directed by a short sequence in both mammalian and yeast systems. *Cell*, 55,  
1267 1159-69.
- 1268 XIAO, H., XU, L. H., YAMADA, Y. & LIU, D. X. 2008. Coronavirus spike protein inhibits  
1269 host cell translation by interaction with eIF3f. *PLoS One*, 3, e1494.
- 1270 XIE, X., MURUATO, A., LOKUGAMAGE, K. G., NARAYANAN, K., ZHANG, X., ZOU, J., LIU,  
1271 J., SCHINDEWOLF, C., BOPP, N. E., AGUILAR, P. V., PLANTE, K. S., WEAVER, S. C.,  
1272 MAKINO, S., LEDUC, J. W., MENACHERY, V. D. & SHI, P. Y. 2020. An Infectious  
1273 cDNA Clone of SARS-CoV-2. *Cell Host Microbe*, 27, 841-848 e3.
- 1274 YOU, Y., RICHER, E. J., HUANG, T. & BRODY, S. L. 2002. Growth and differentiation of  
1275 mouse tracheal epithelial cells: selection of a proliferative population. *Am J*  
1276 *Physiol Lung Cell Mol Physiol*, 283, L1315-21.
- 1277 YOUNG, M. D., WAKEFIELD, M. J., SMYTH, G. K. & OSHLACK, A. 2010. Gene ontology  
1278 analysis for RNA-seq: accounting for selection bias. *Genome Biol*, 11, R14.
- 1279 ZHANG, P., HE, D., XU, Y., HOU, J., PAN, B. F., WANG, Y., LIU, T., DAVIS, C. M., EHLLI, E. A.,  
1280 TAN, L., ZHOU, F., HU, J., YU, Y., CHEN, X., NGUYEN, T. M., ROSEN, J. M., HAWKE,  
1281 D. H., JI, Z. & CHEN, Y. 2017. Genome-wide identification and differential  
1282 analysis of translational initiation. *Nat Commun*, 8, 1749.
- 1283 ZHOU, B., LIU, J., WANG, Q., LIU, X., LI, X., LI, P., MA, Q. & CAO, C. 2008. The nucleocapsid  
1284 protein of severe acute respiratory syndrome coronavirus inhibits cell  
1285 cytokinesis and proliferation by interacting with translation elongation factor  
1286 1alpha. *J Virol*, 82, 6962-71.
- 1287 ZHOU, Z., REN, L., ZHANG, L., ZHONG, J., XIAO, Y., JIA, Z., GUO, L., YANG, J., WANG, C.,  
1288 JIANG, S., YANG, D., ZHANG, G., LI, H., CHEN, F., XU, Y., CHEN, M., GAO, Z., YANG,  
1289 J., DONG, J., LIU, B., ZHANG, X., WANG, W., HE, K., JIN, Q., LI, M. & WANG, J. 2020.  
1290 Heightened Innate Immune Responses in the Respiratory Tract of COVID-19  
1291 Patients. *Cell Host Microbe*, 27, 883-890 e2.

1292

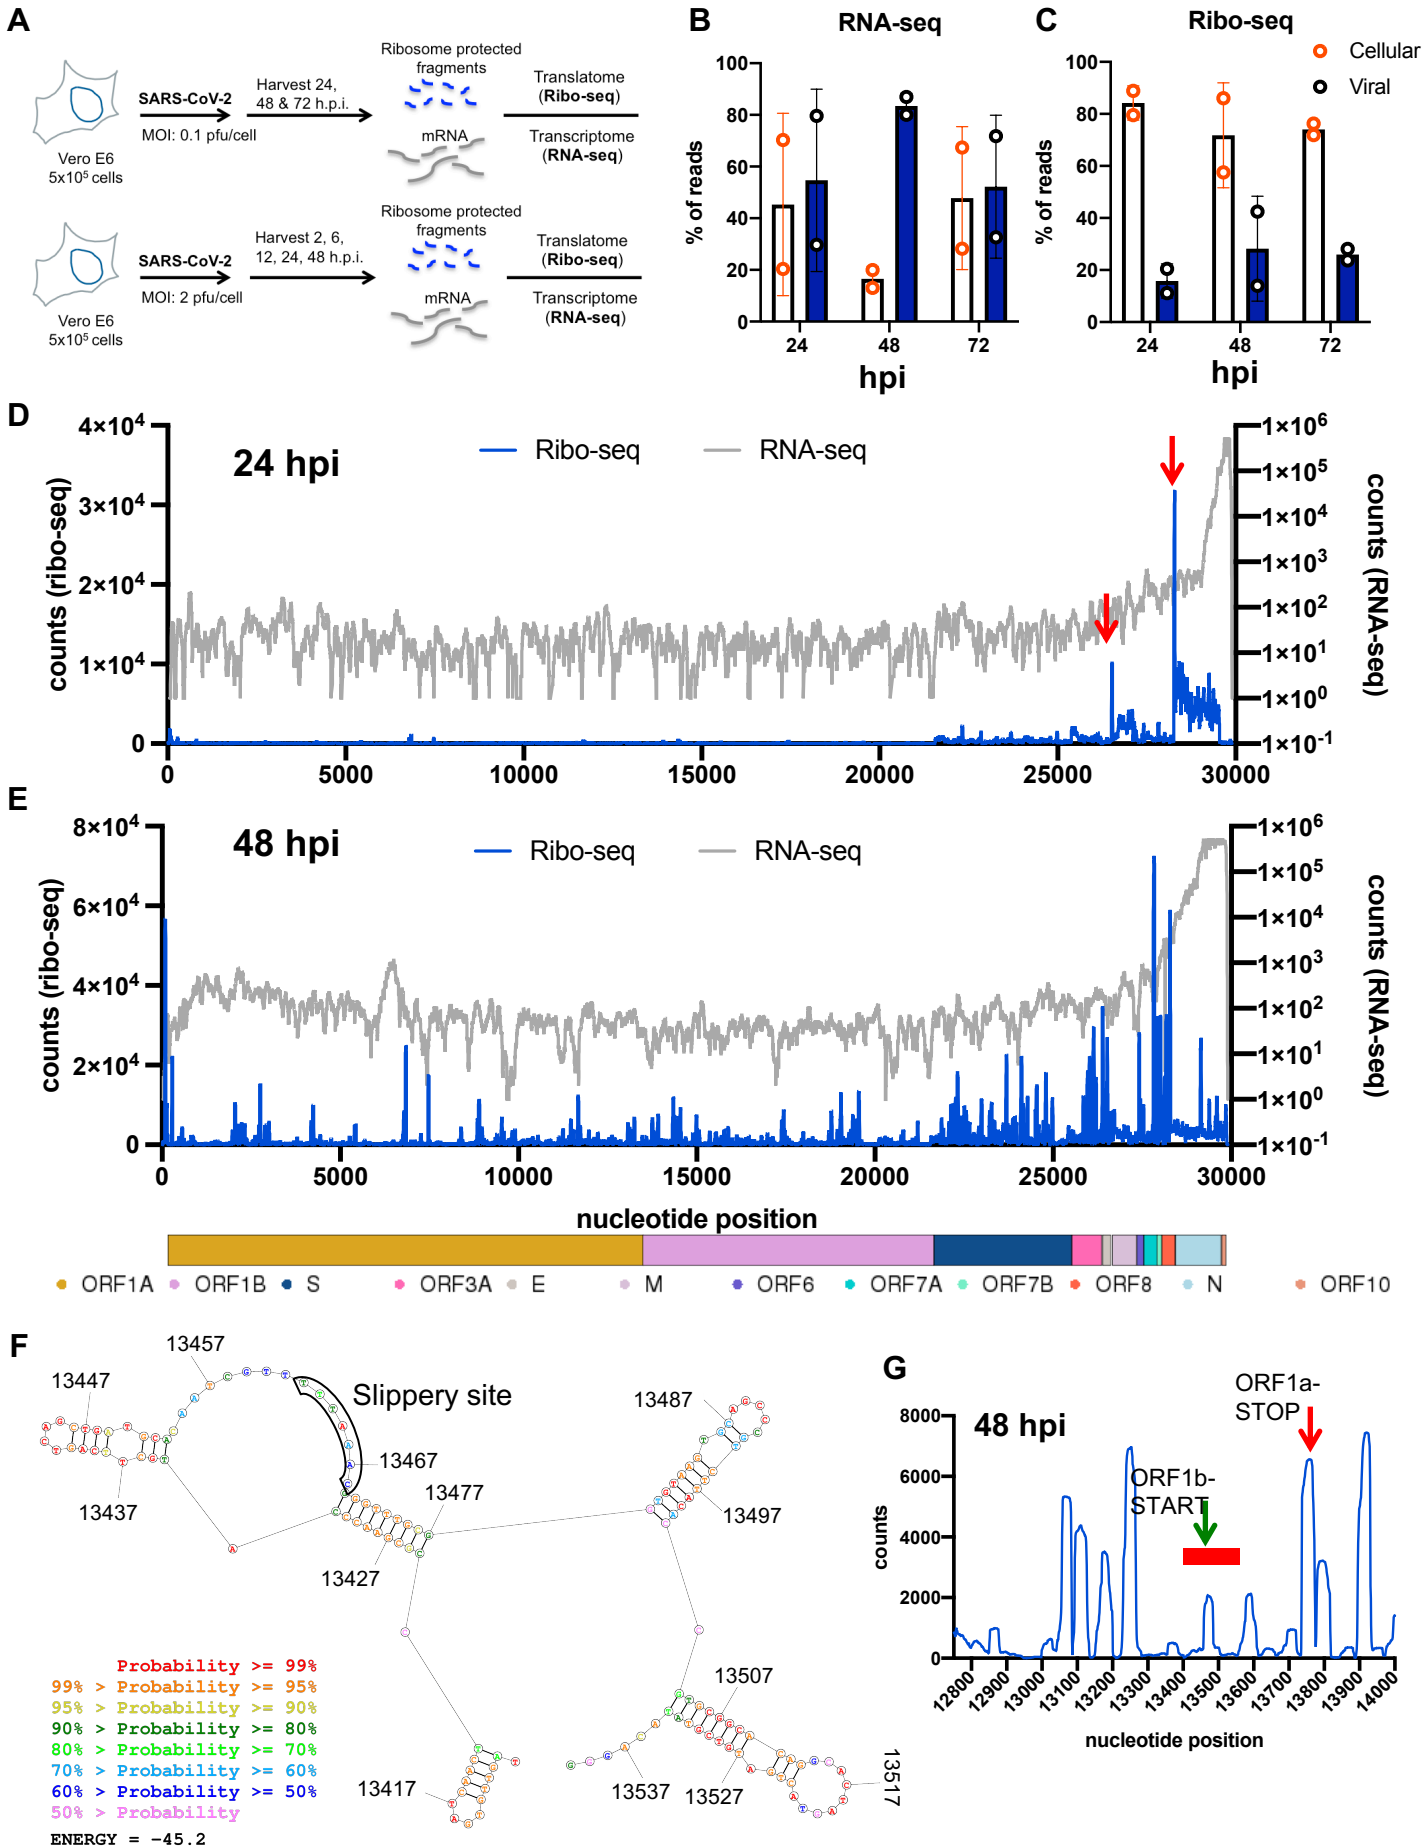

**Figure 1**

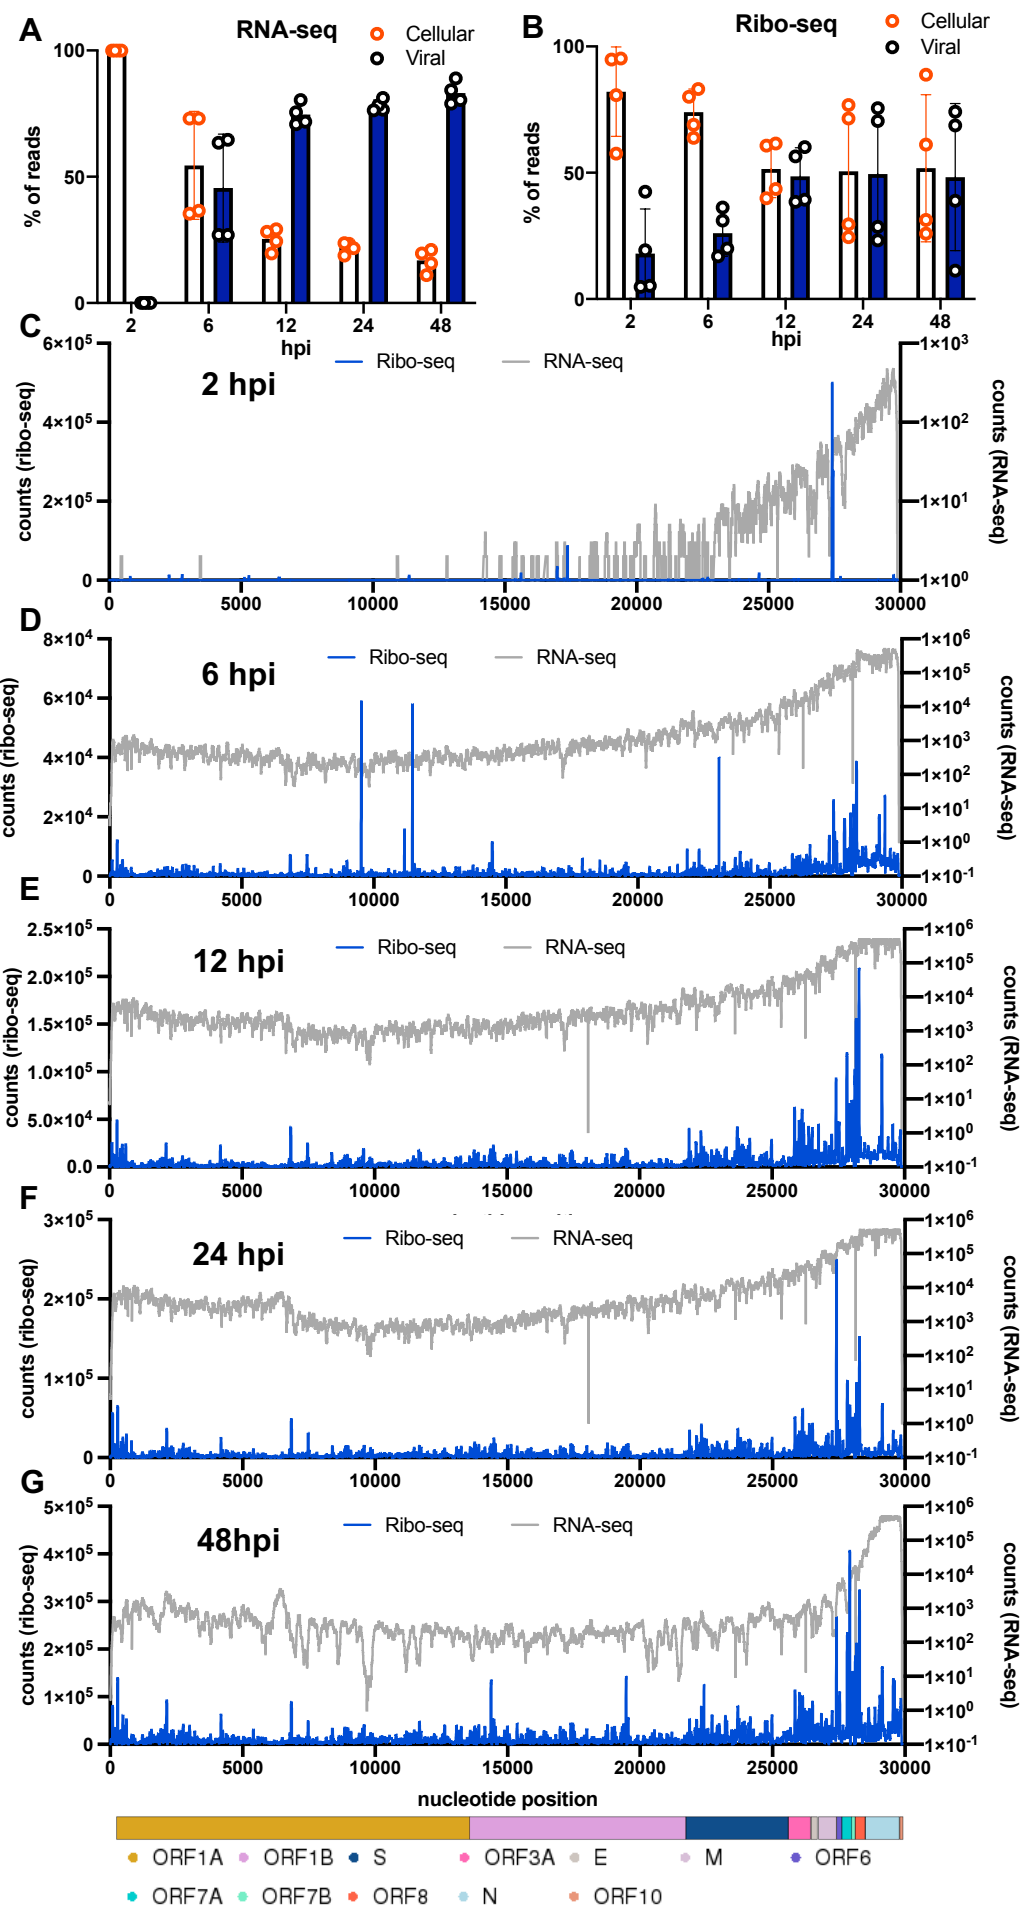

**Figure 2**



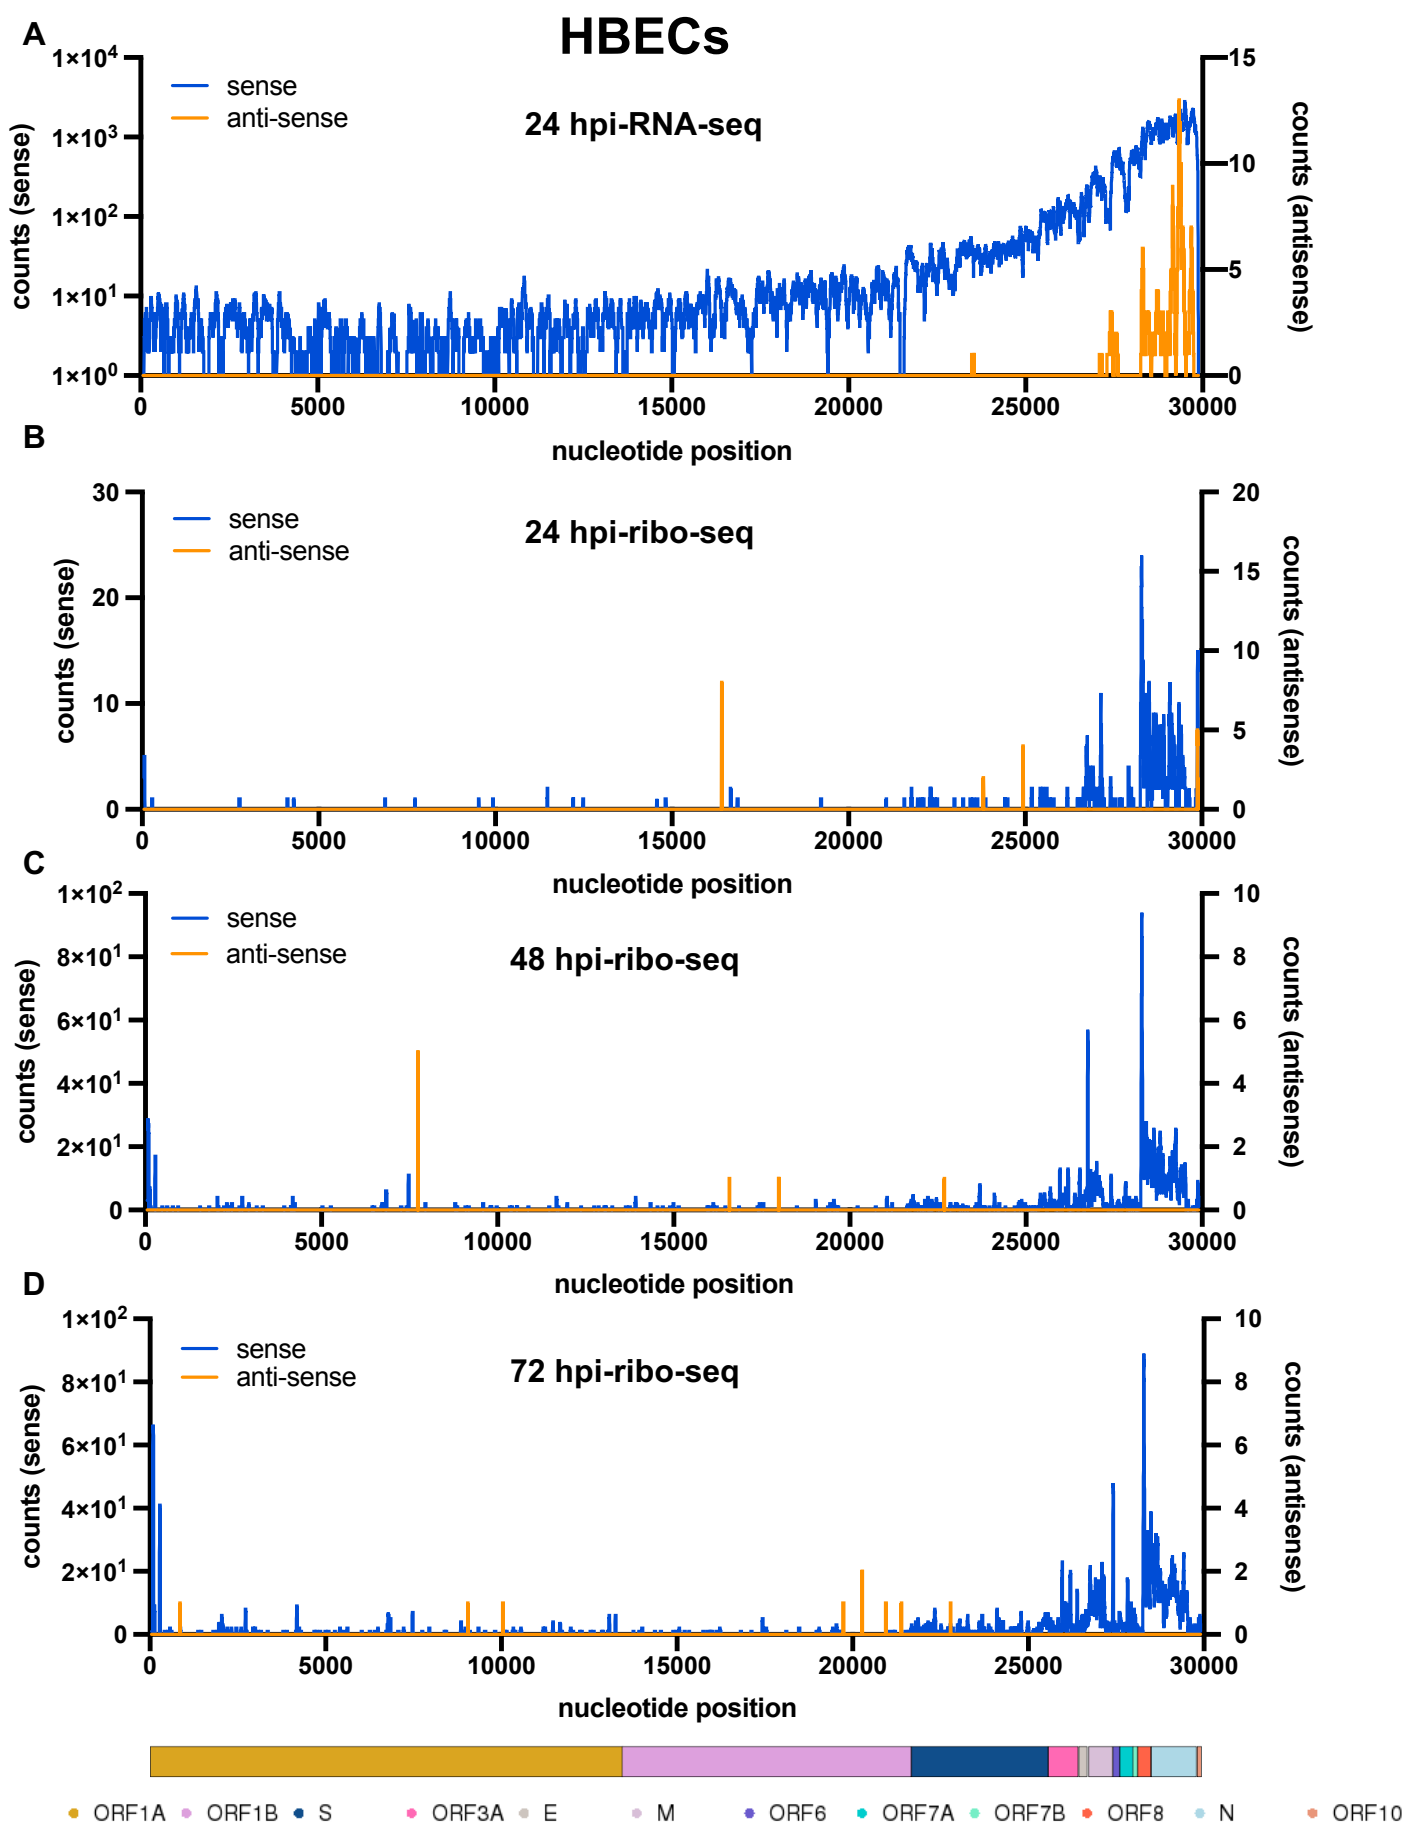

**Figure 3**

## RNA-seq

**A** 2 hpi

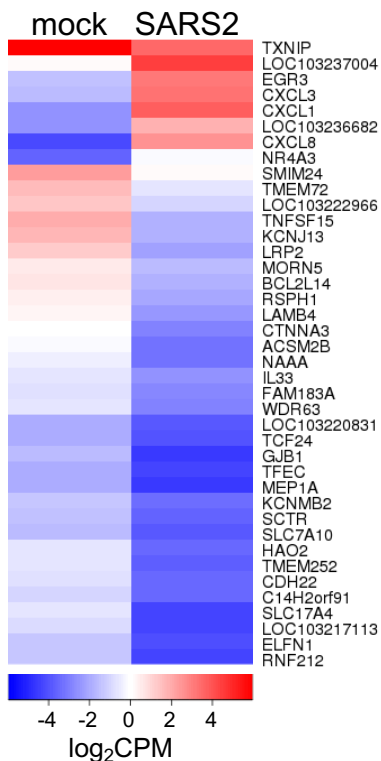

**B** 6 hpi

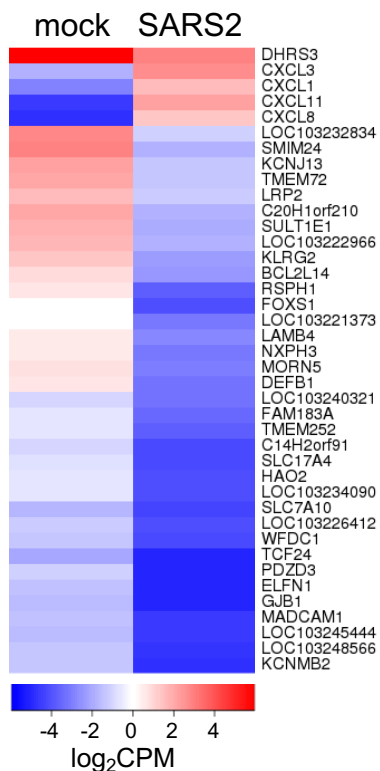

**C** 12 hpi

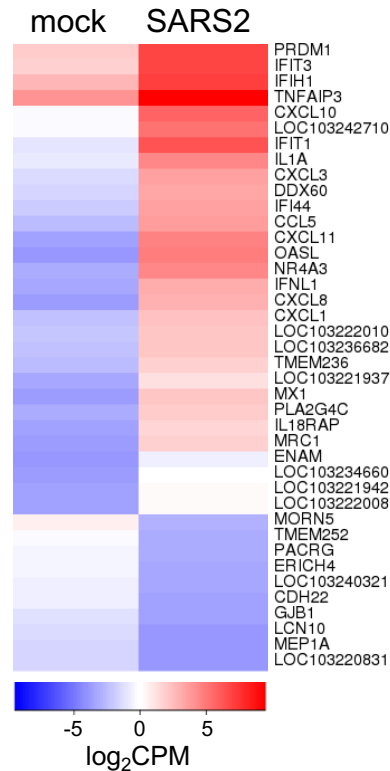

## Ribo-seq

**D** 2 hpi

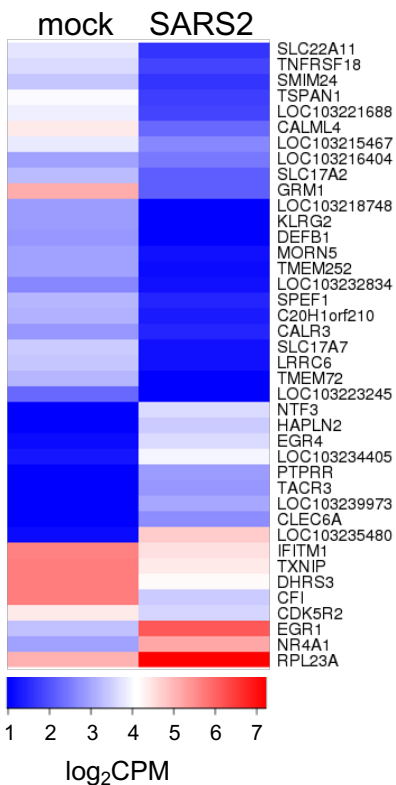

**E** 6 hpi

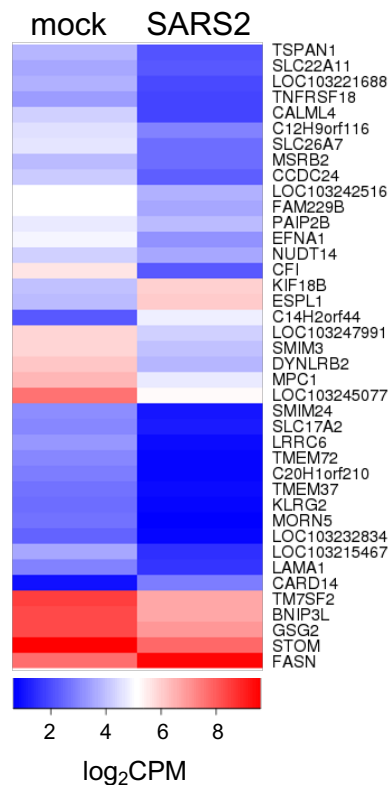

**F** 12 hpi

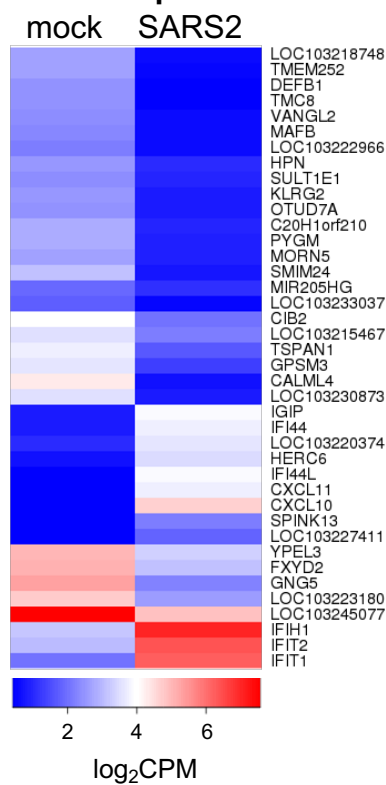

Figure 4

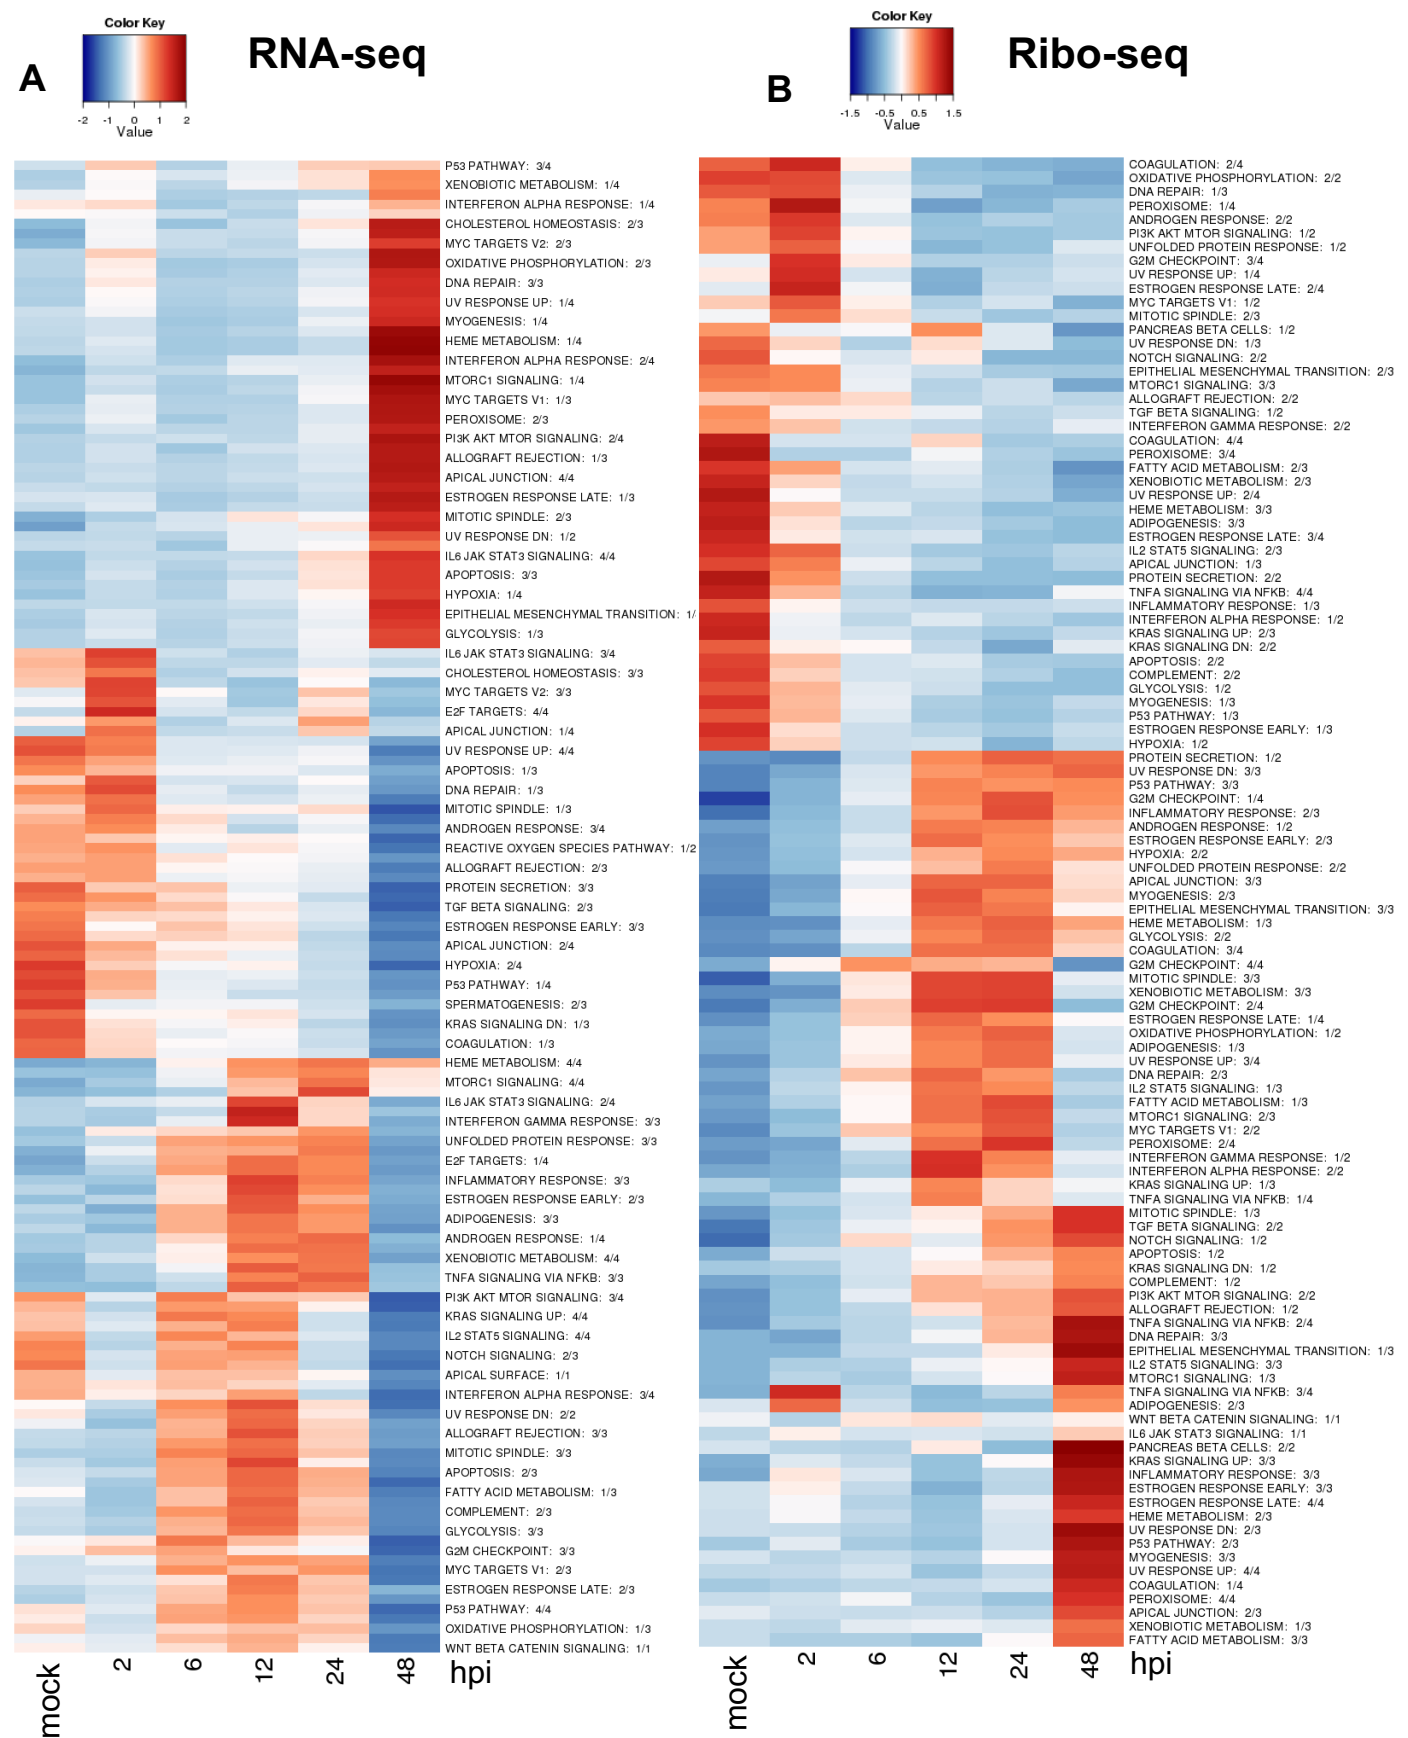

**Figure 5**

## RNA-seq

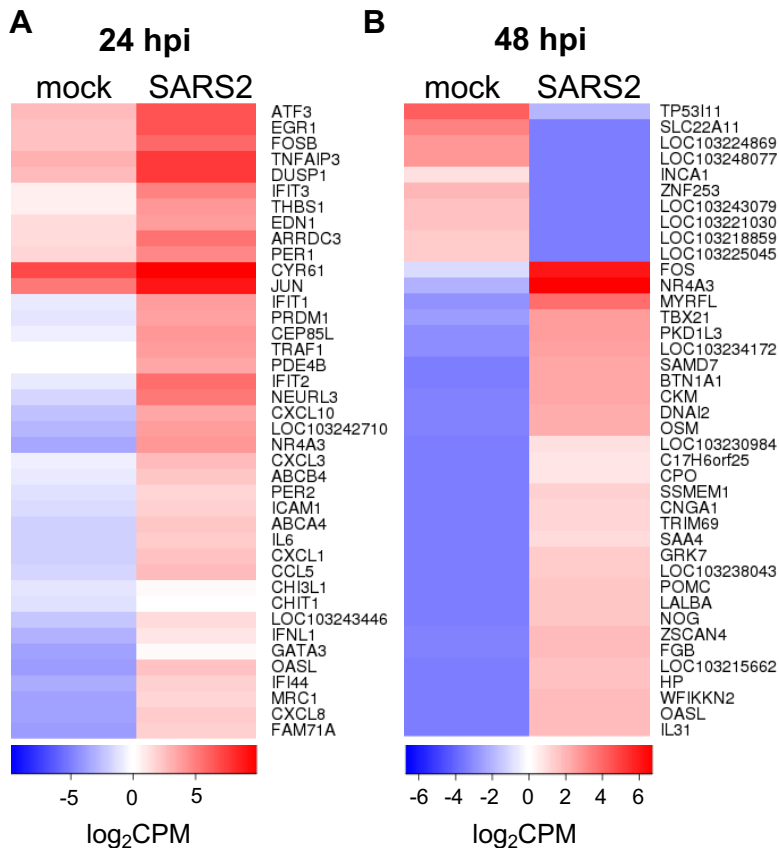

## Ribo-seq

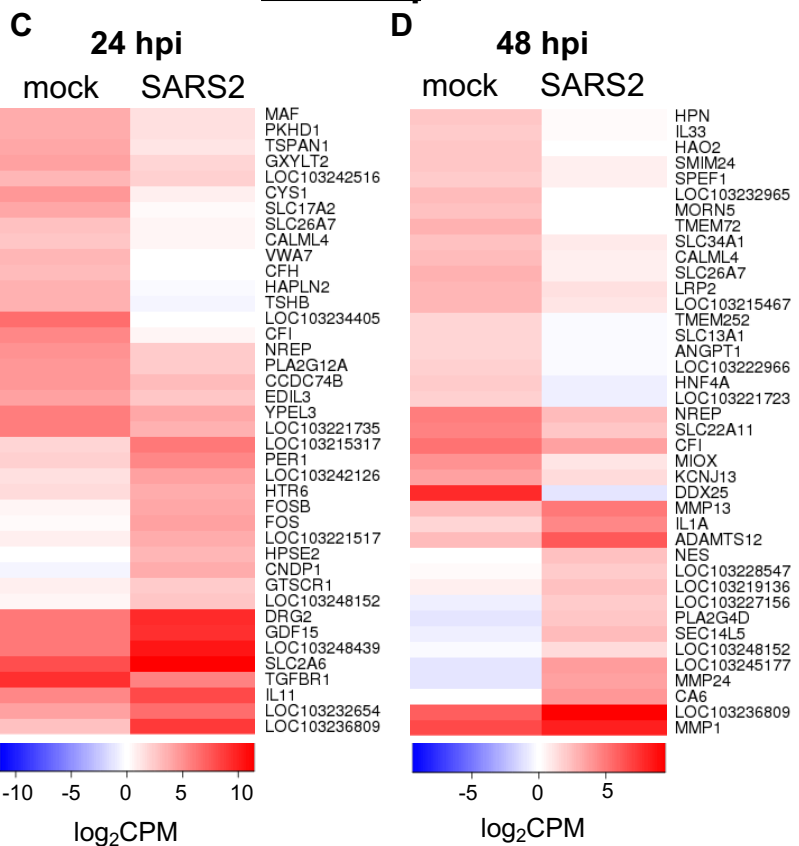

Figure 6

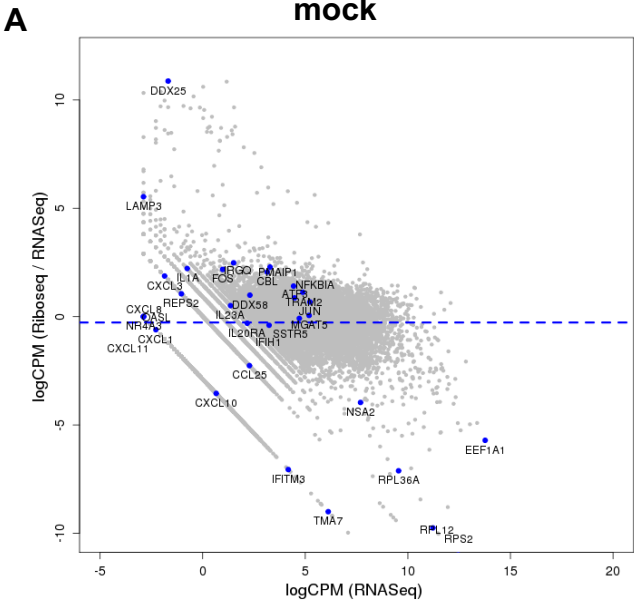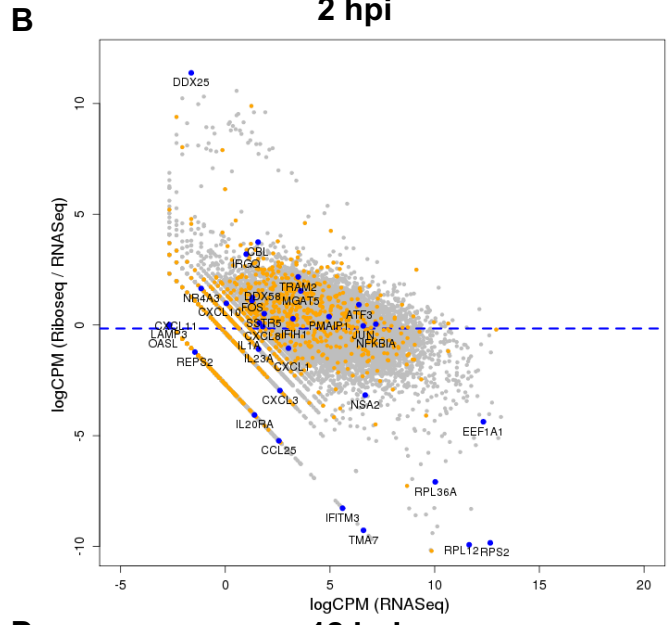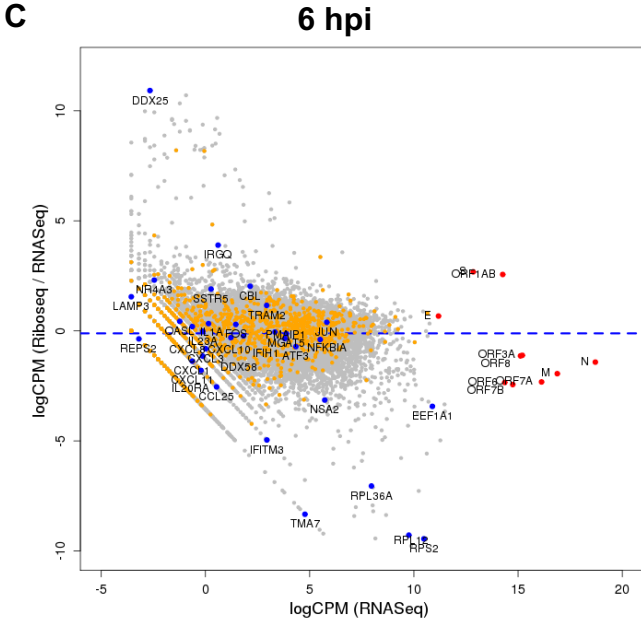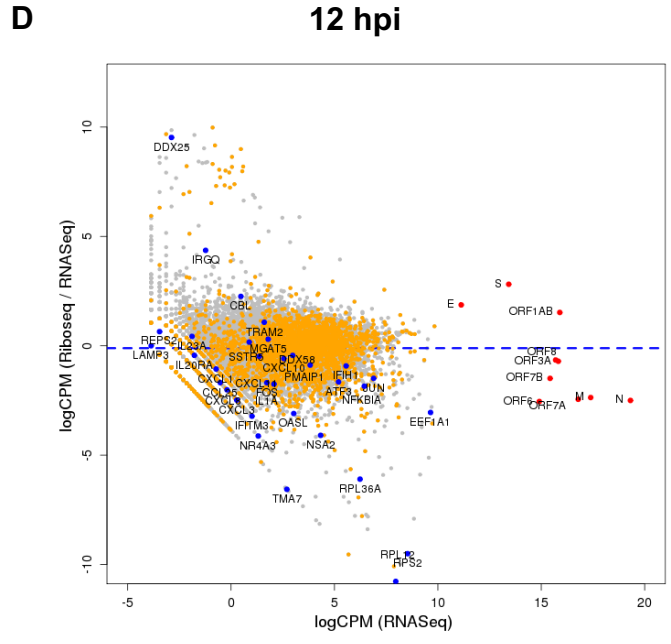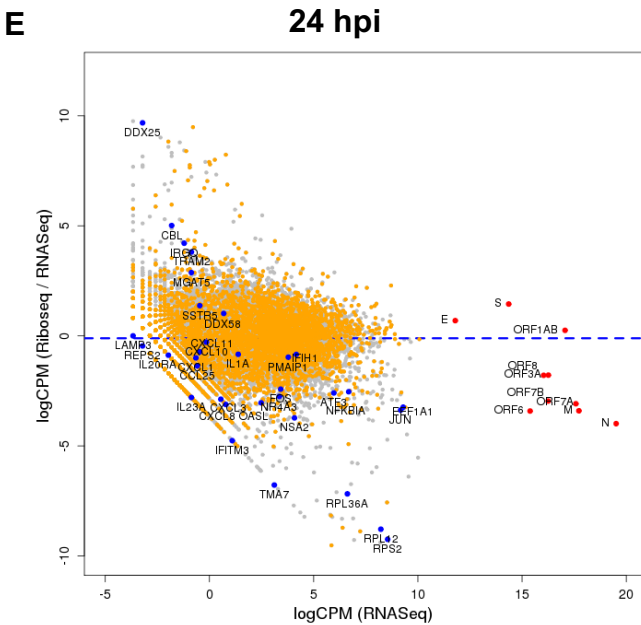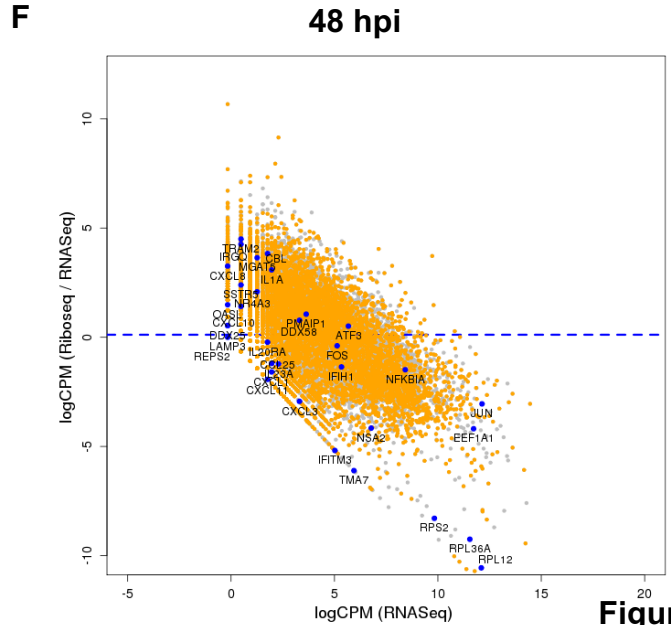

**Figure 7**
